# Supplementary material for: Aerobic Exercise Improve Physical Endurance and Muscle Function by Ameliorating Oxidative Stress and Modulating Mitochondrial Dynamics in Aged Skeletal Muscle
Source: Research Square preprint supplement (doi:10.21203/rs.3.rs-6539156/v1), 2025-05-16

HE

200X

400X

200X

400X

YC1

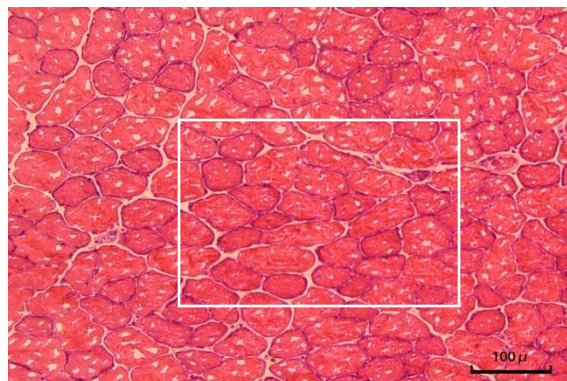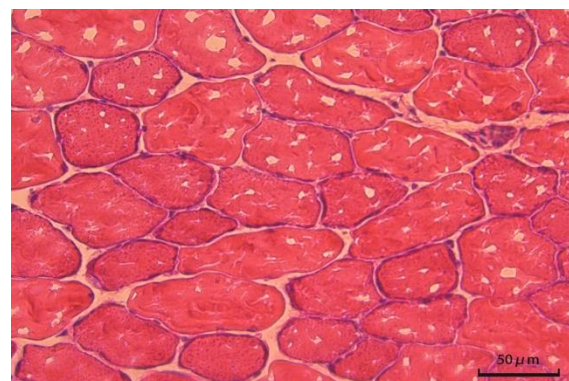

YC4

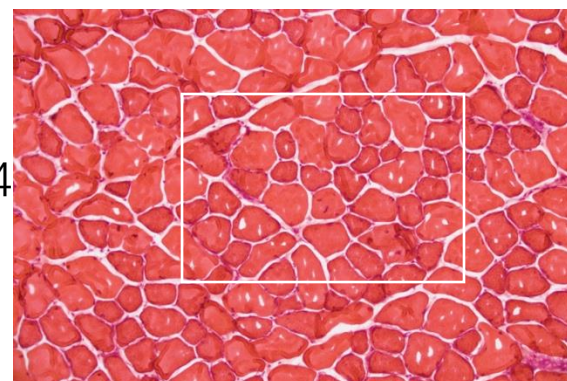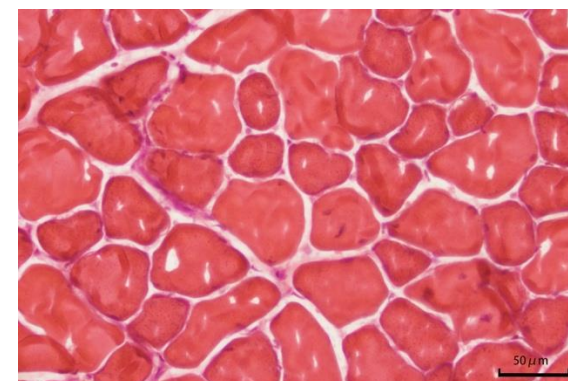

YC2

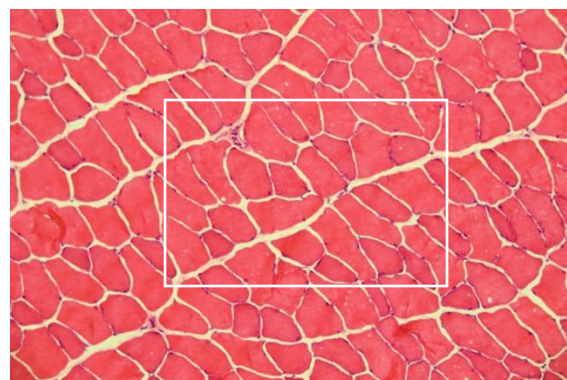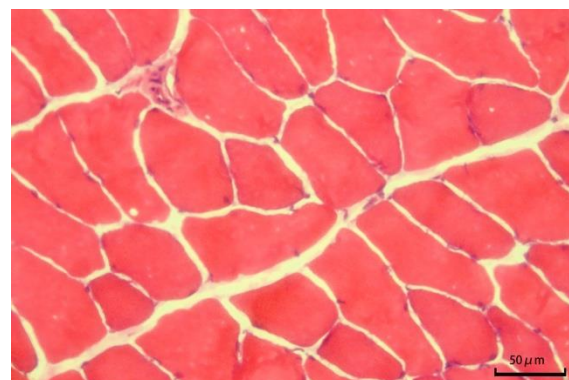

YC5

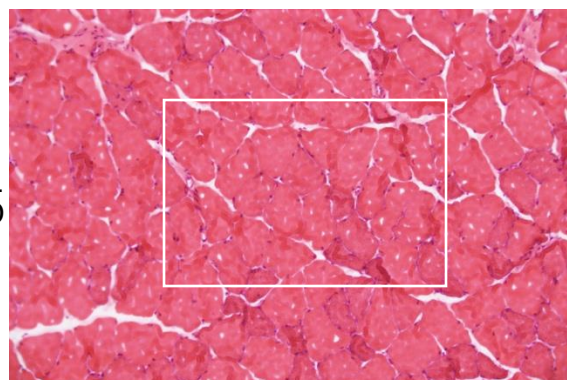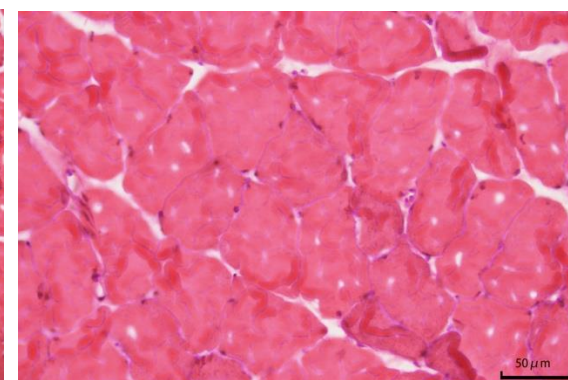

YC3

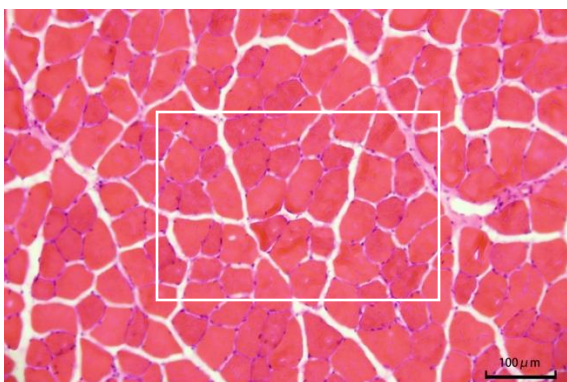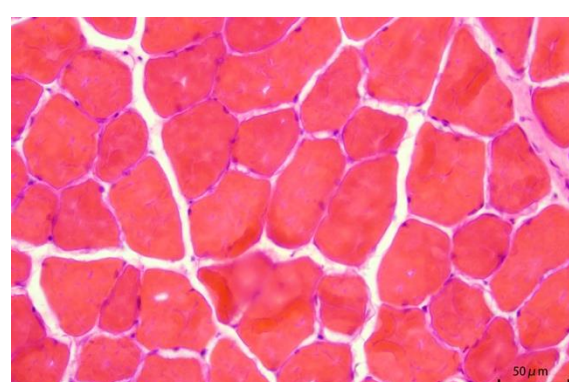

YC6

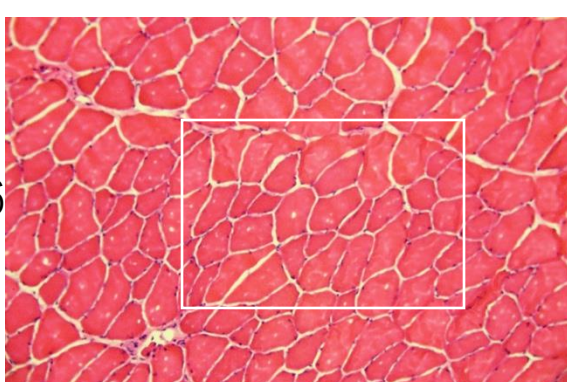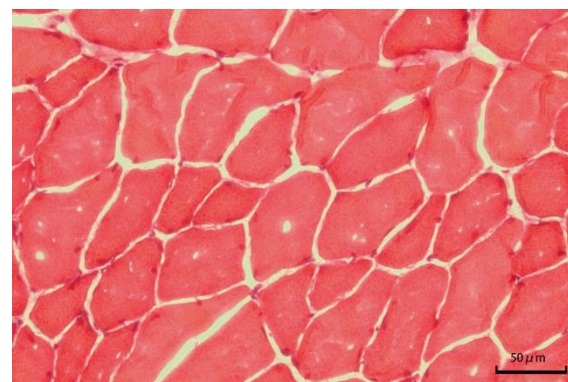



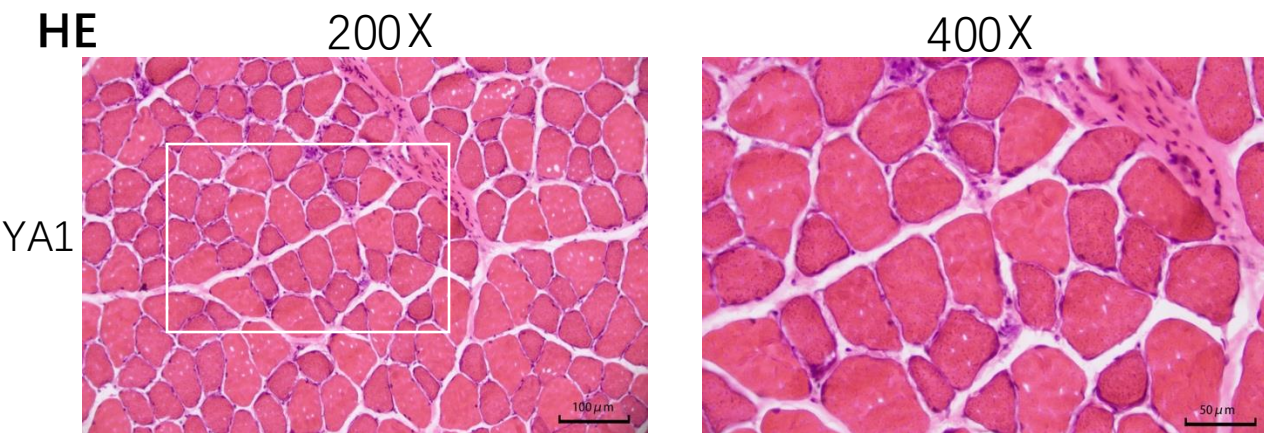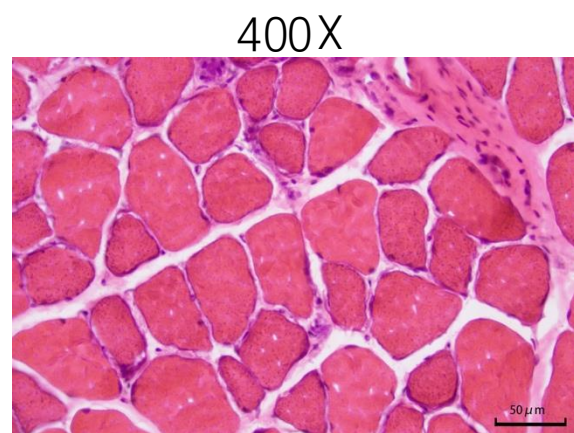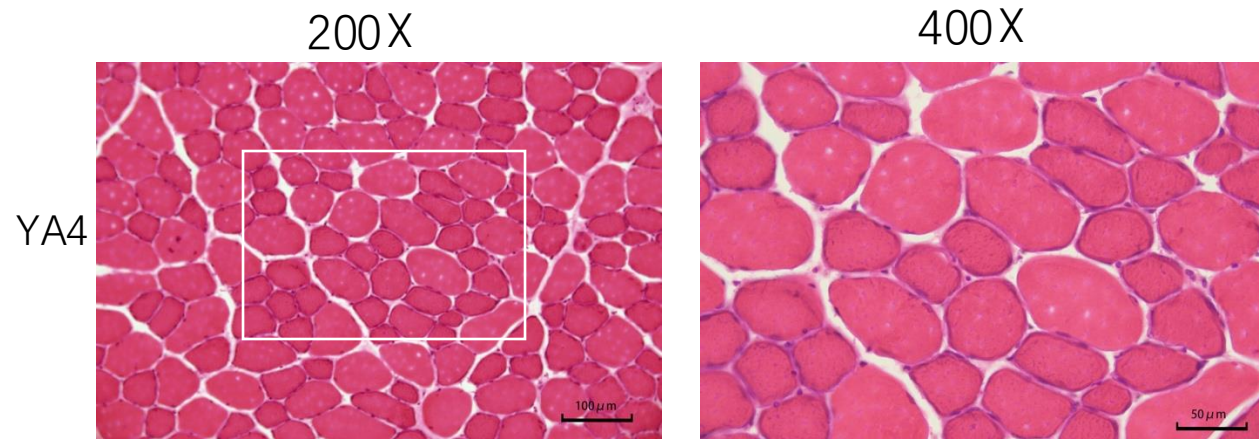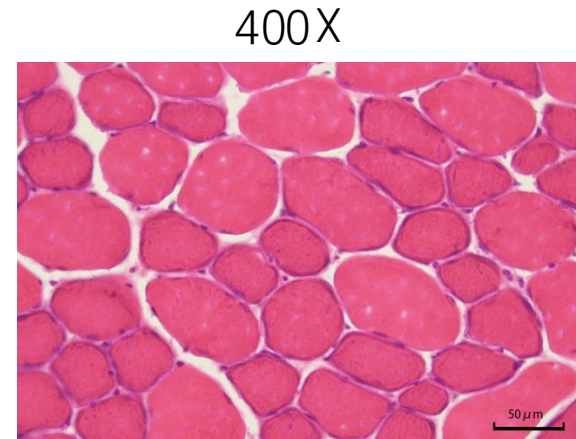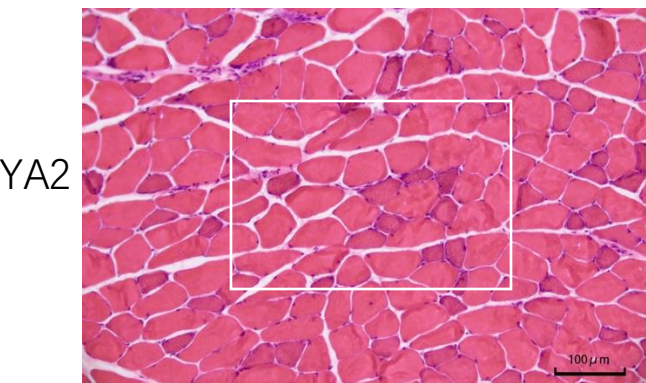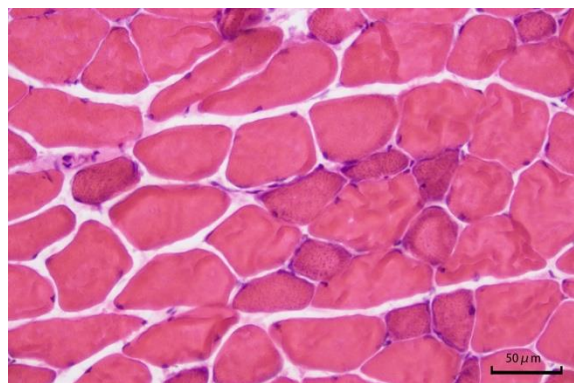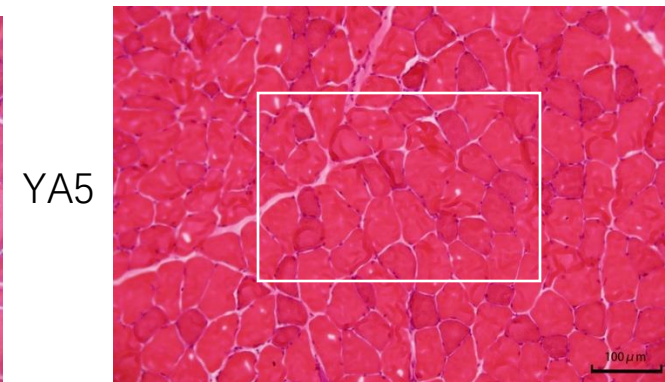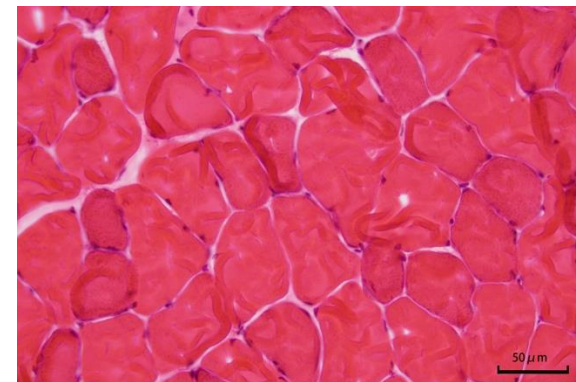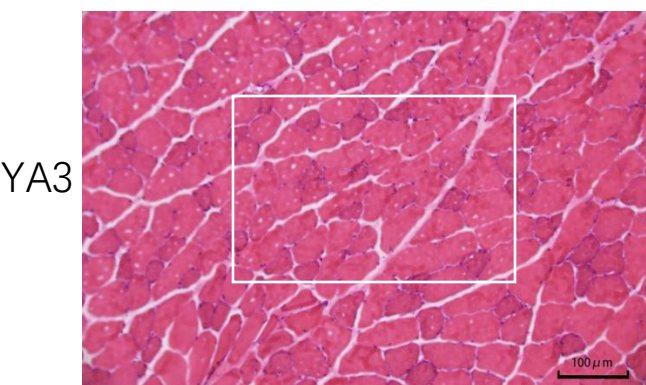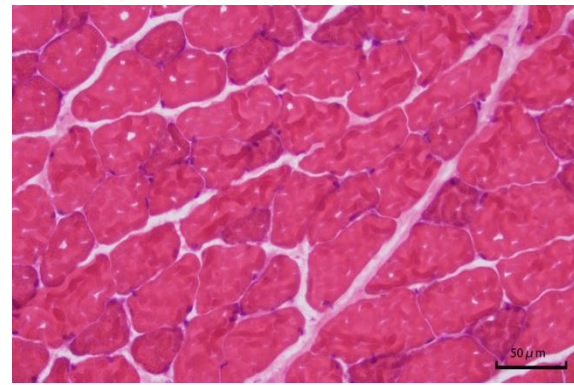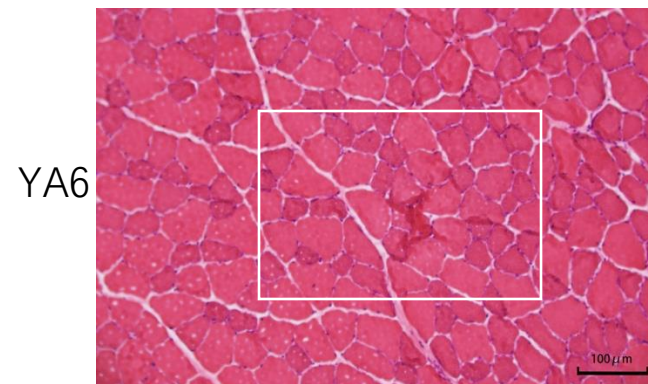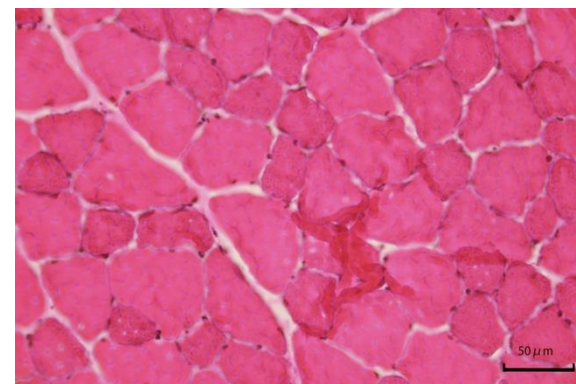



HE

200X

400X

200X

400X

OC1

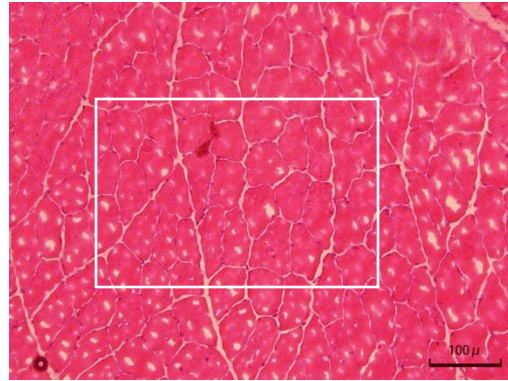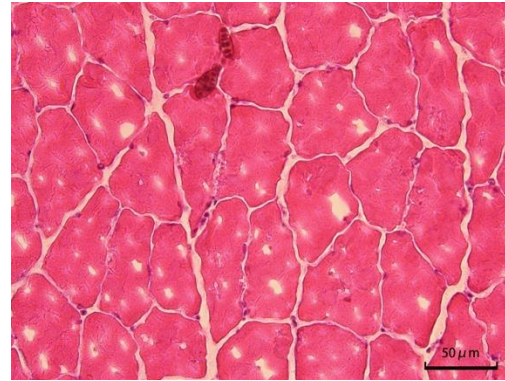

OC4

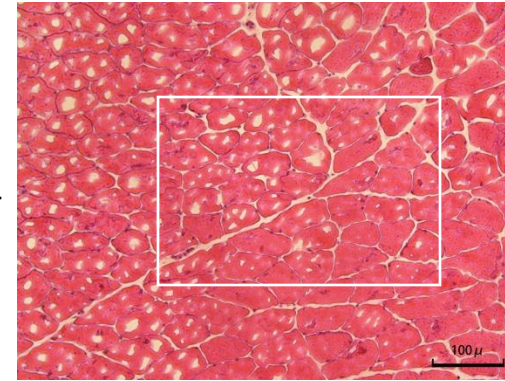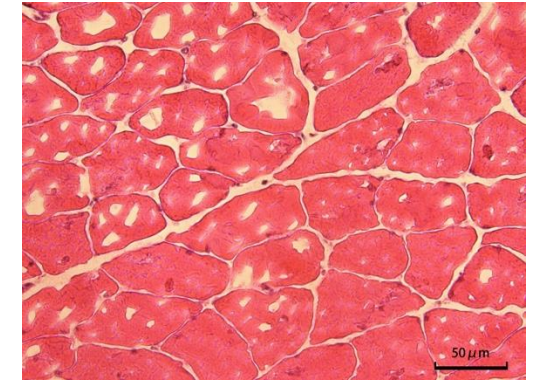

OC2

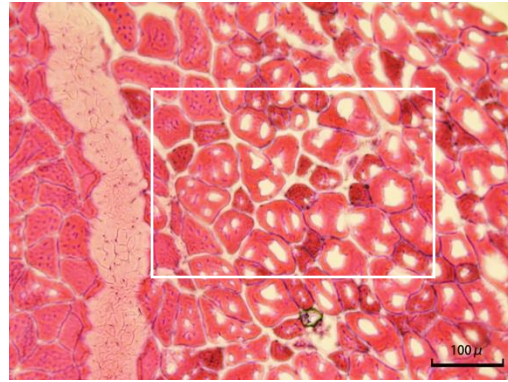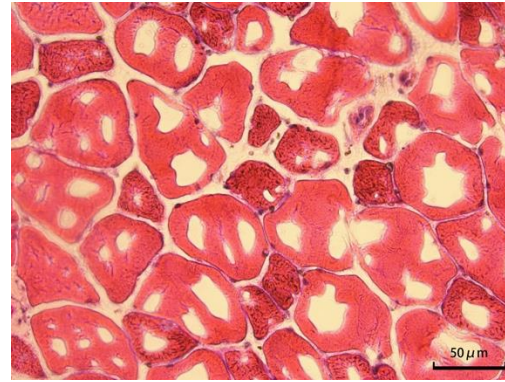

OC5

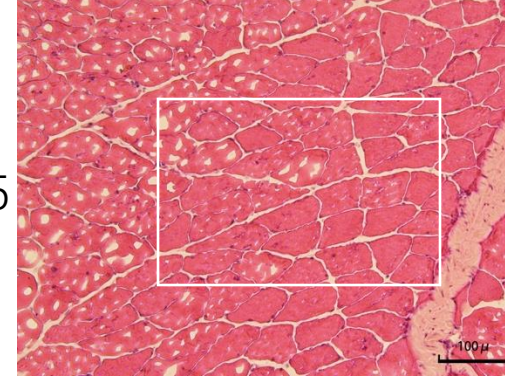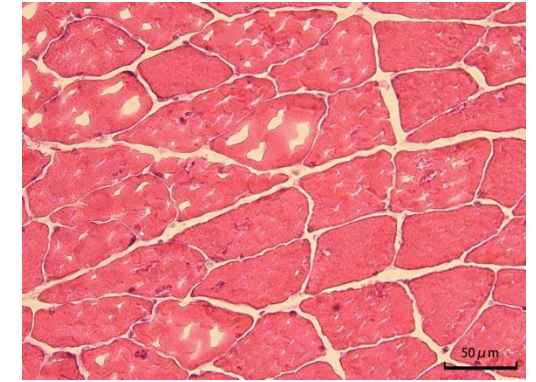

OC3

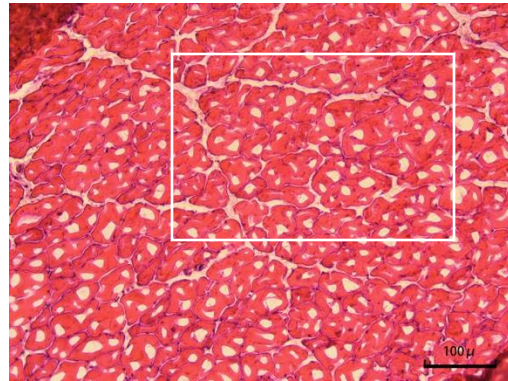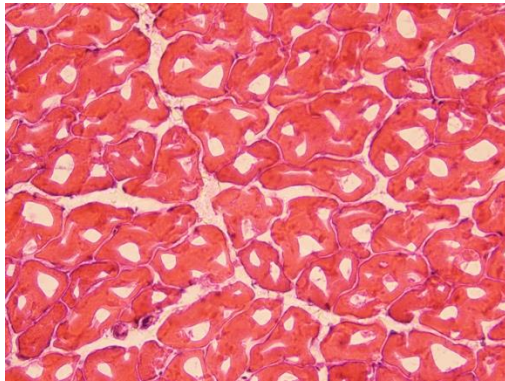

OC6

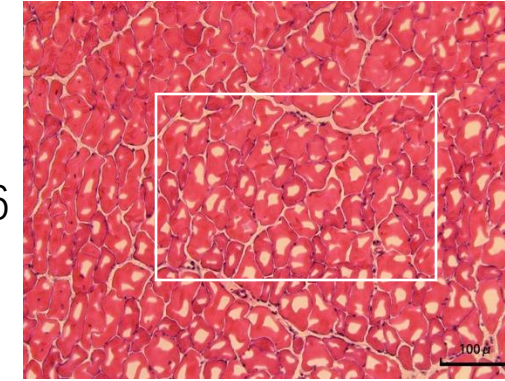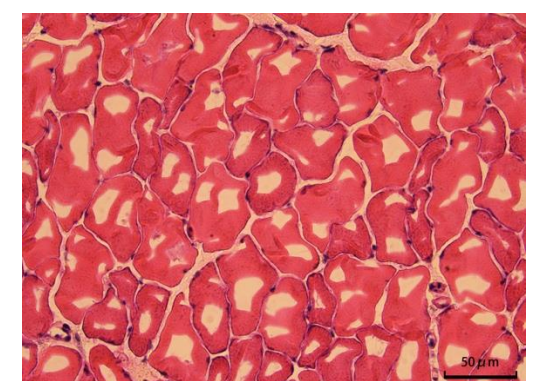



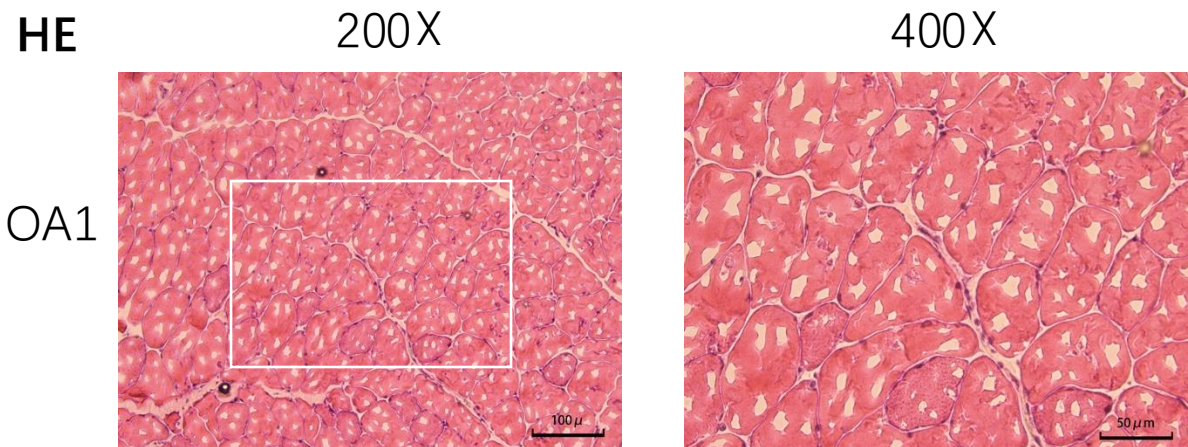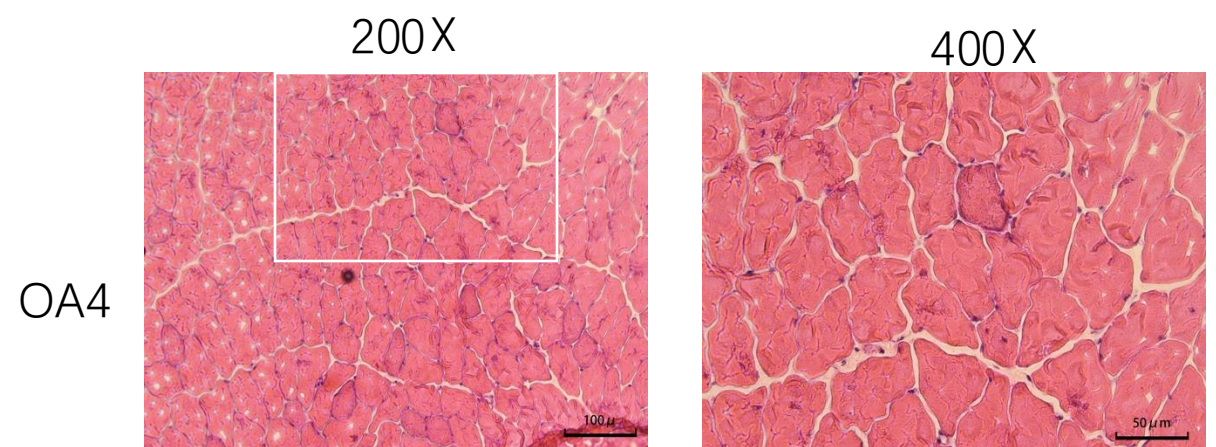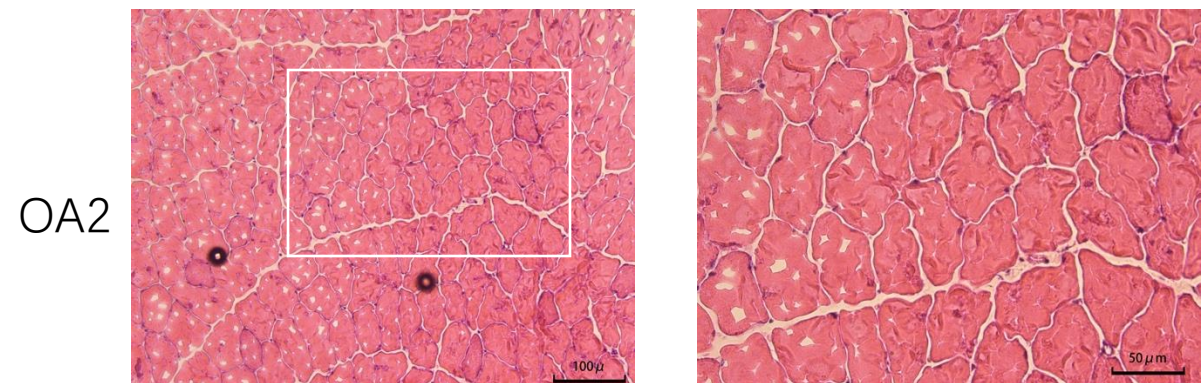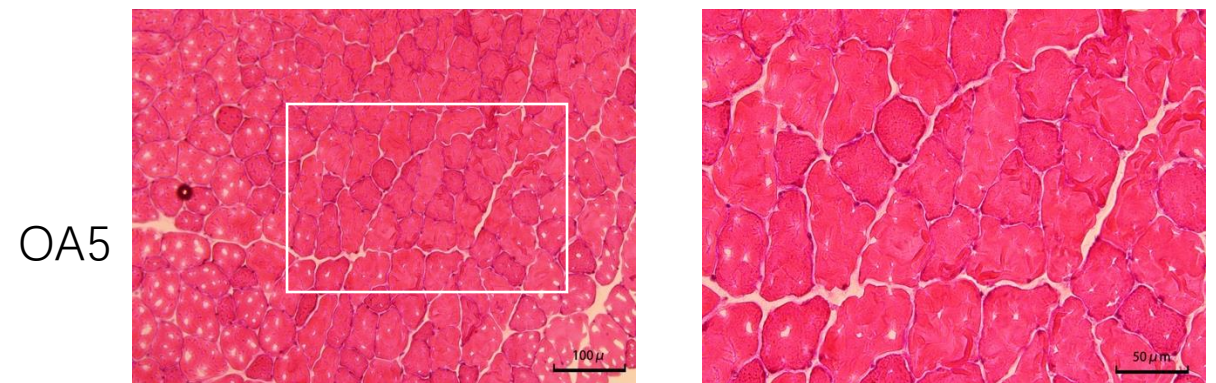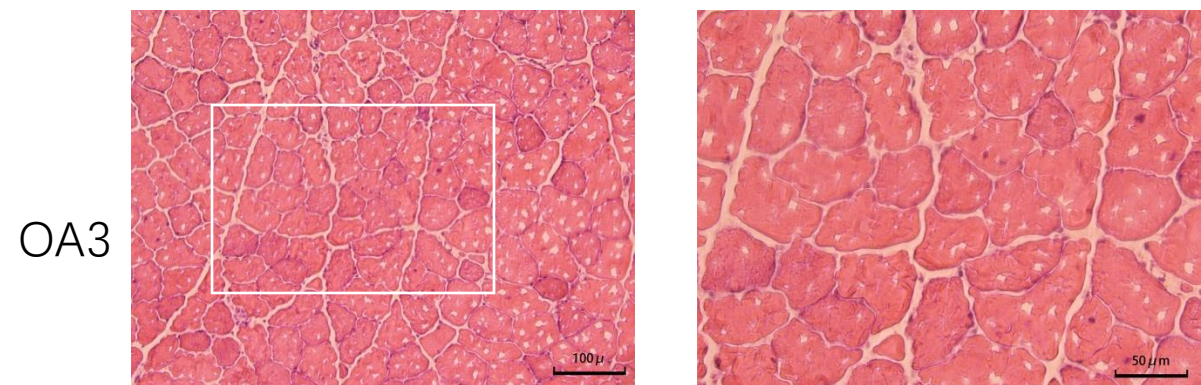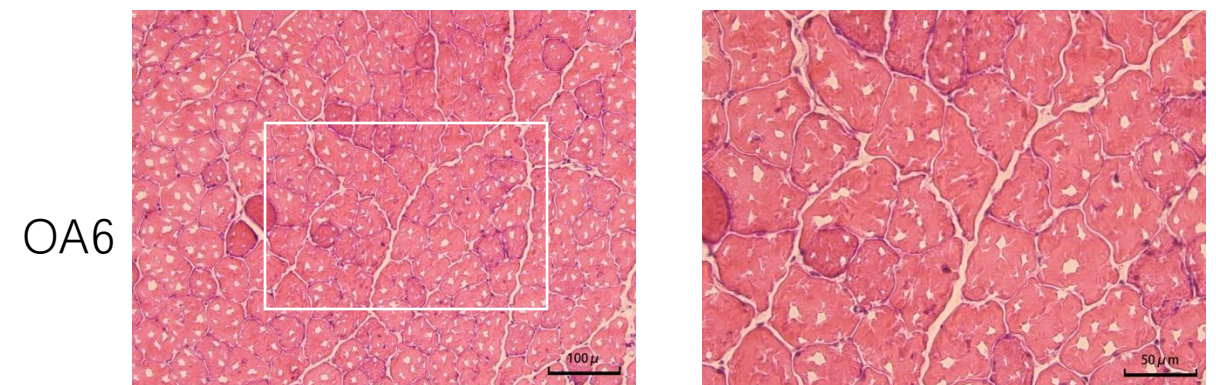



ATPASE

200X

400X

200X

400X

YC1

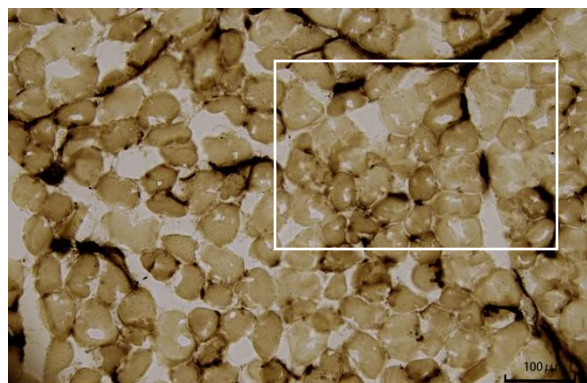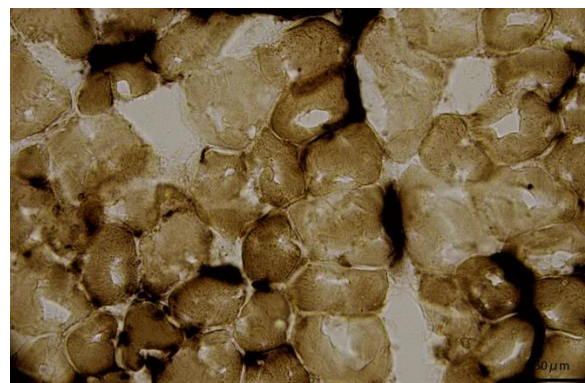

YC4

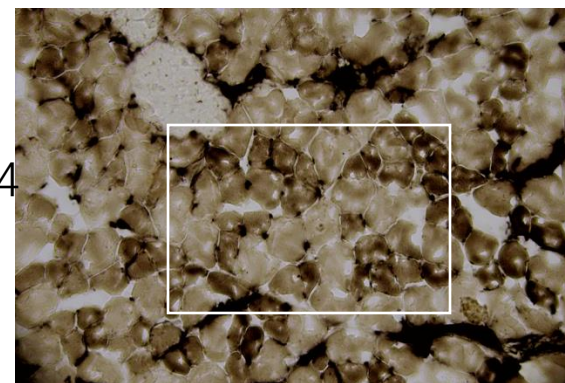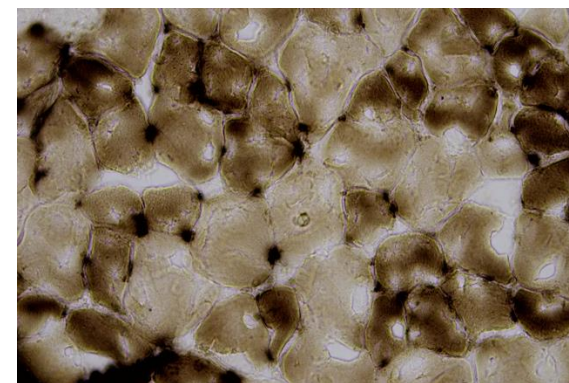

YC2

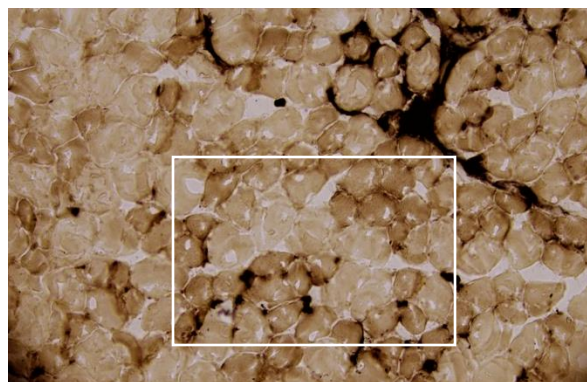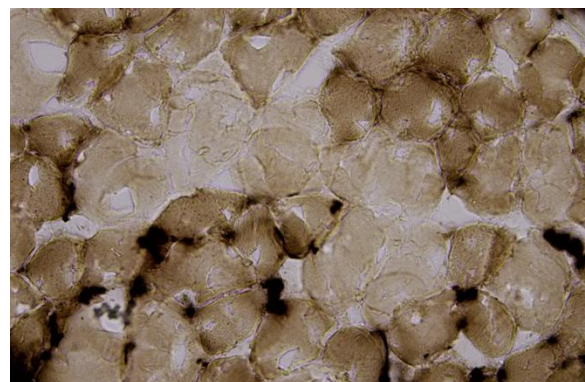

YC5

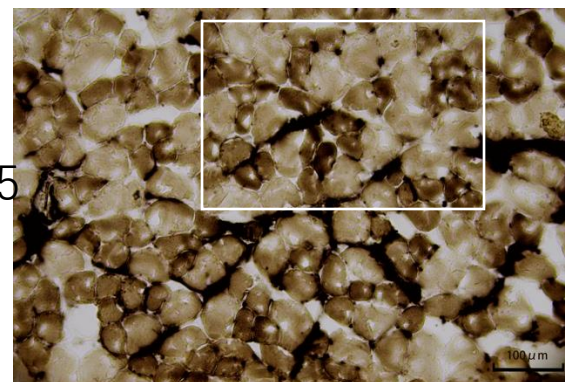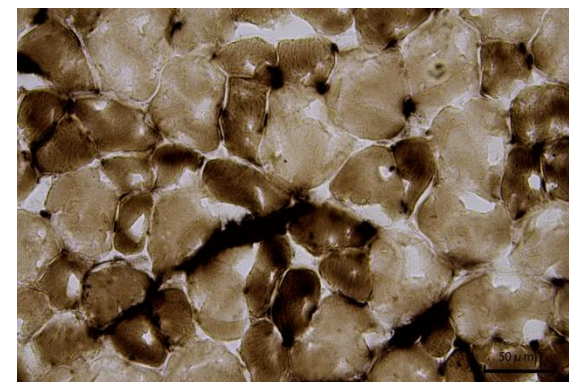

YC3

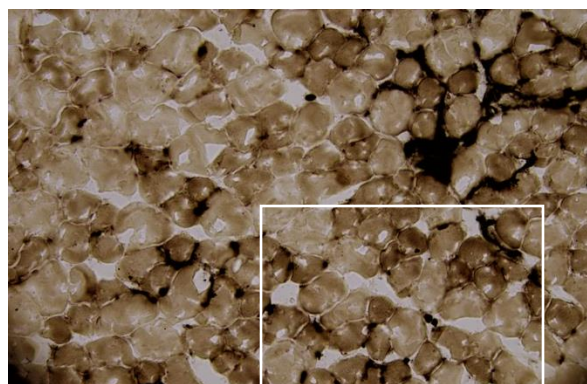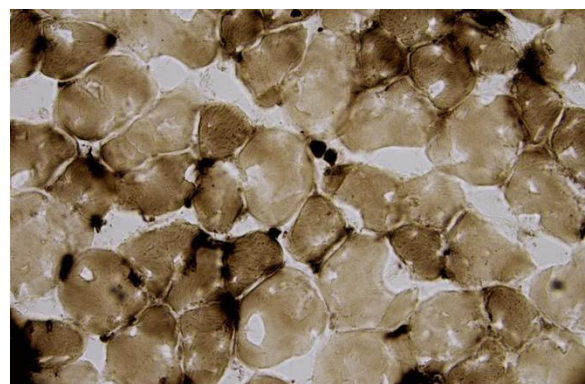

YC6

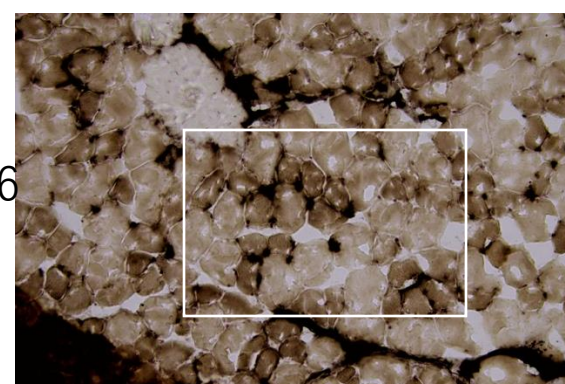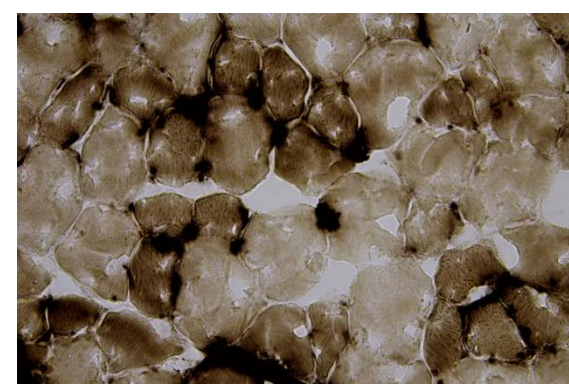



ATPASE 200X

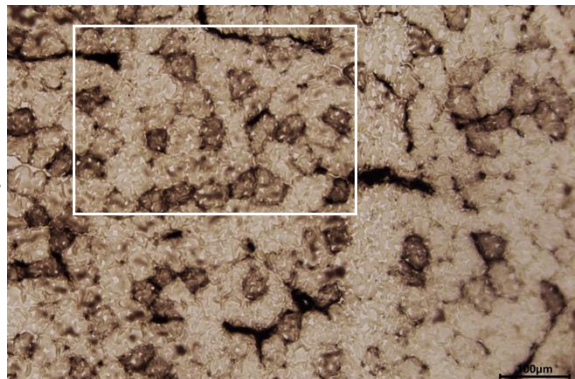

400X

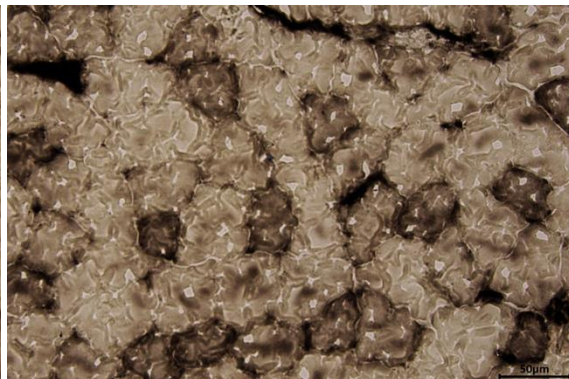

200X

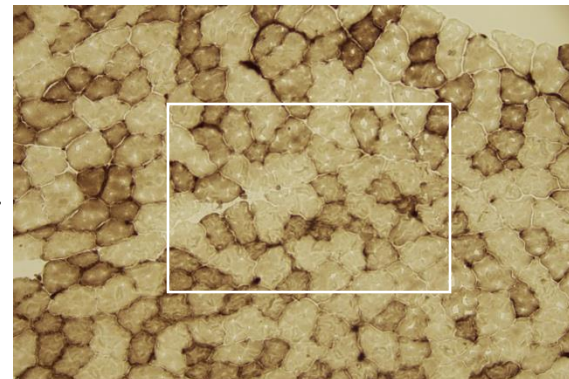

400X

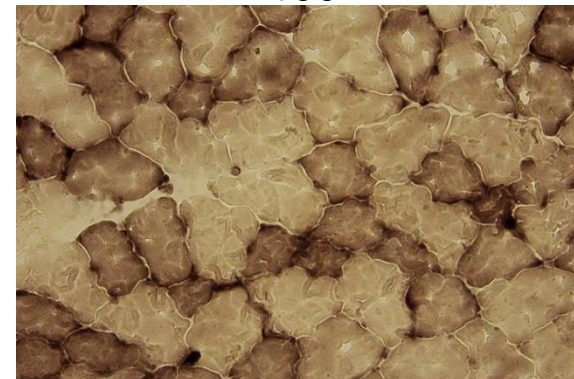

YA2

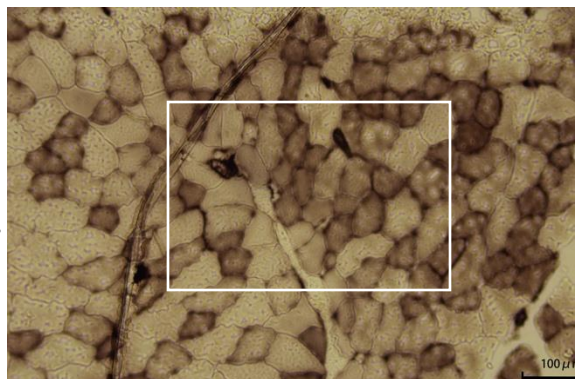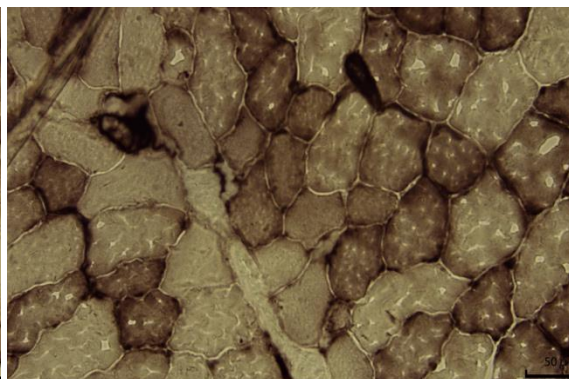

YA5

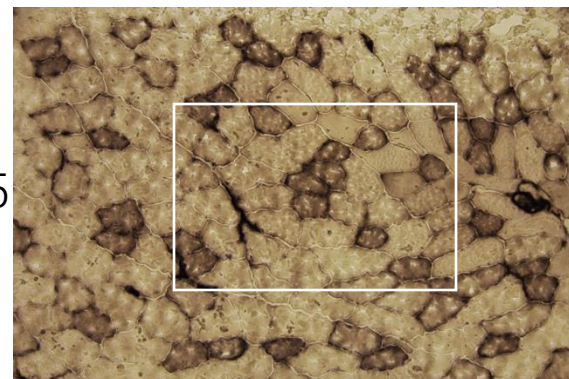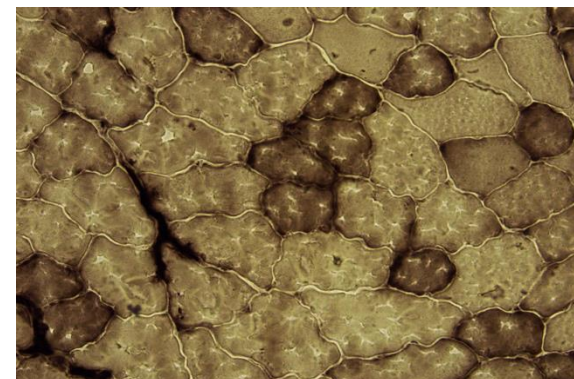

YA3

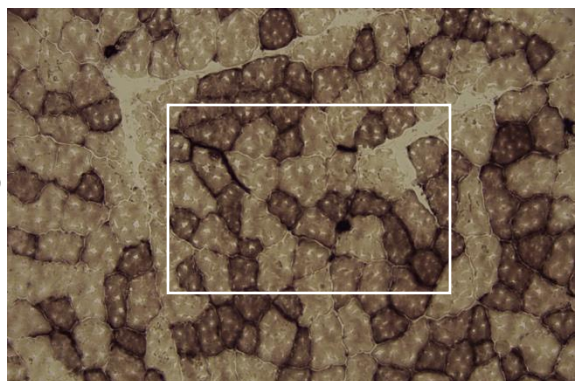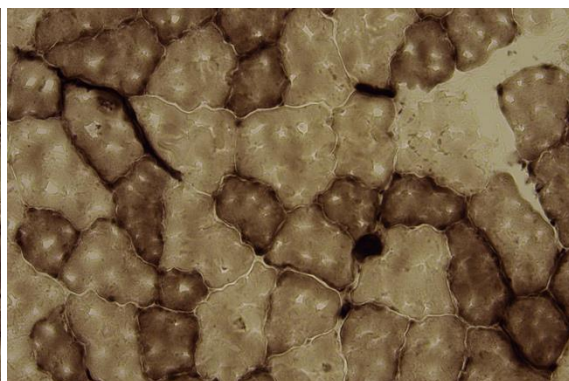

YA6

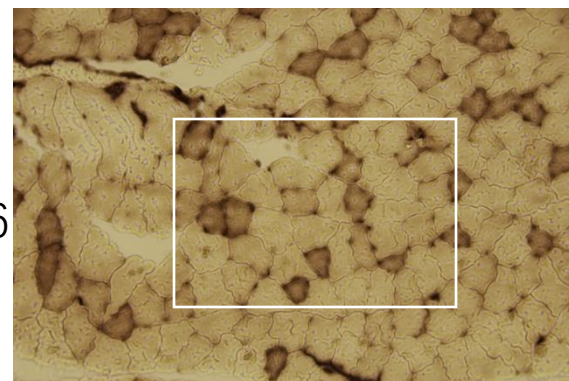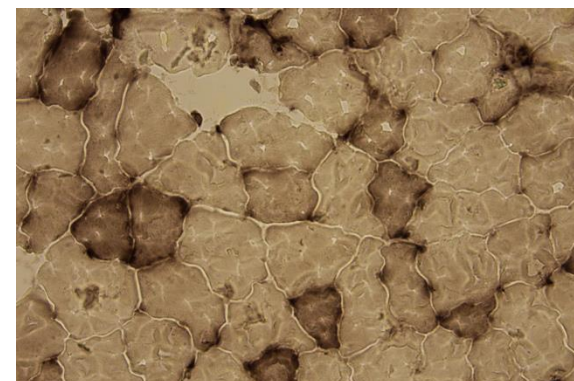



ATPASE 200X

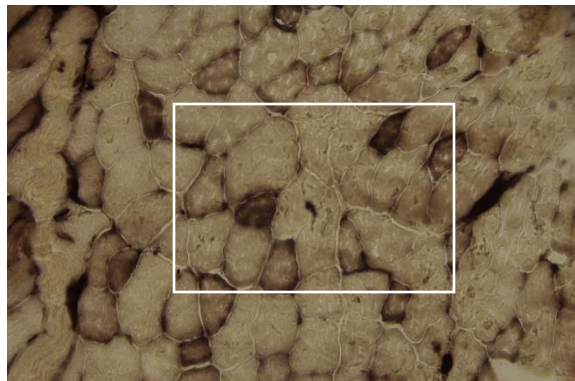

400X

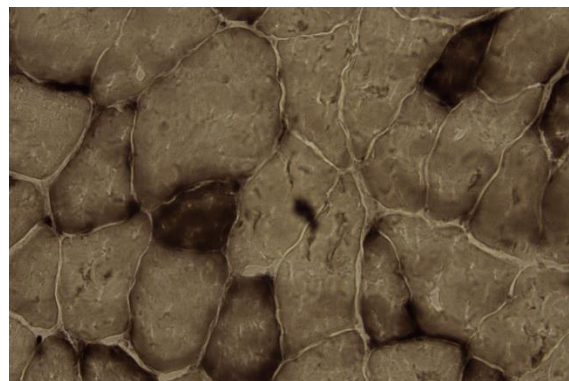

200X

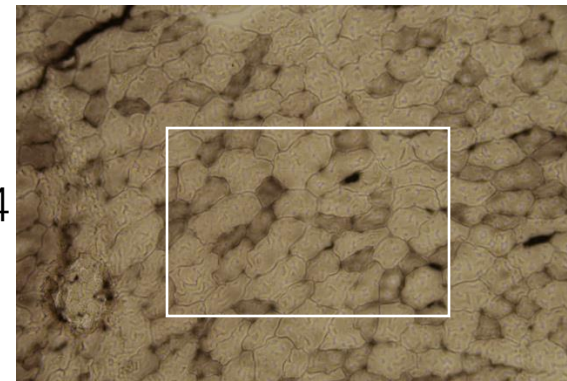

400X

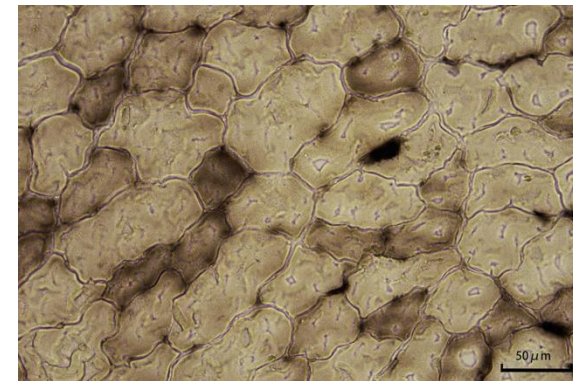

OC1

OC4

OC2

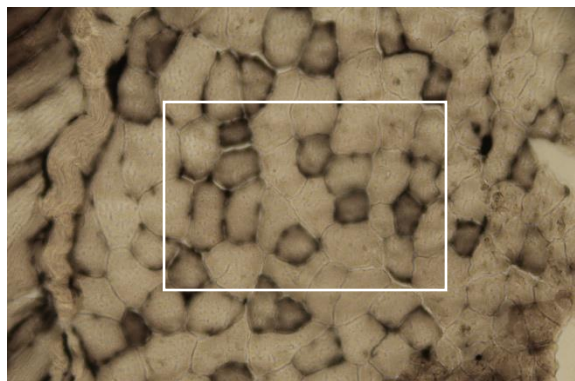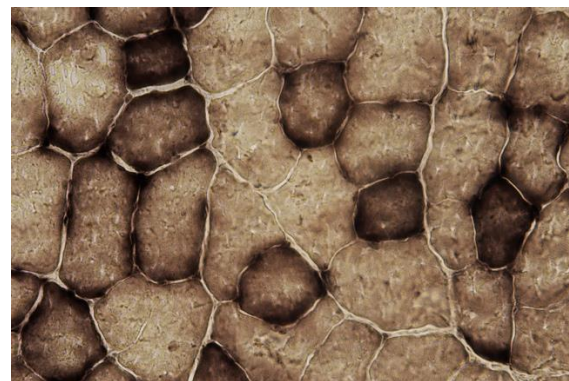

OC5

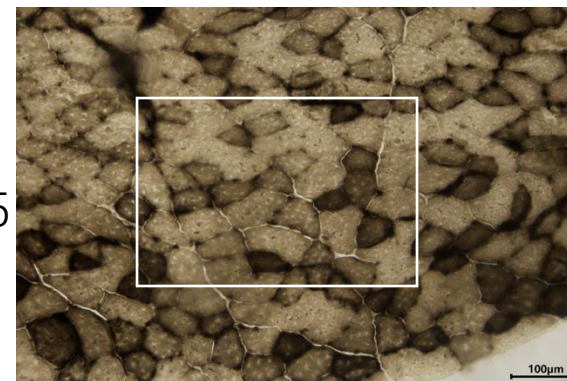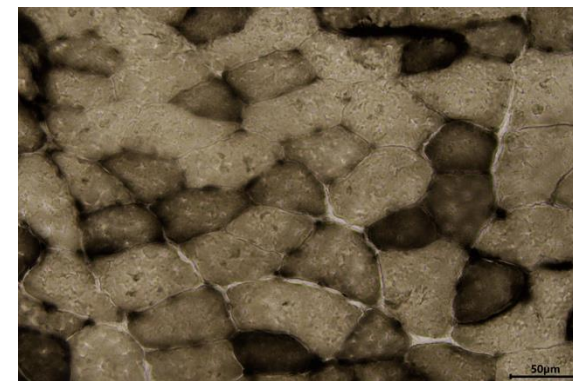

OC3

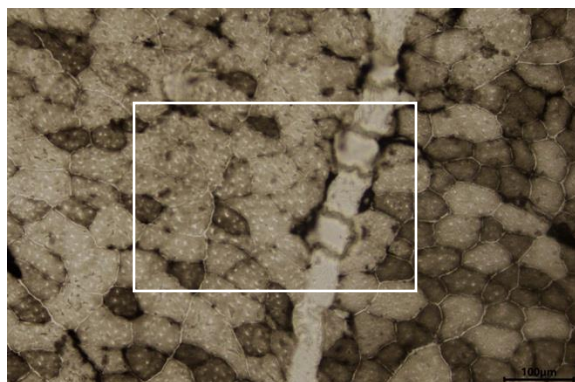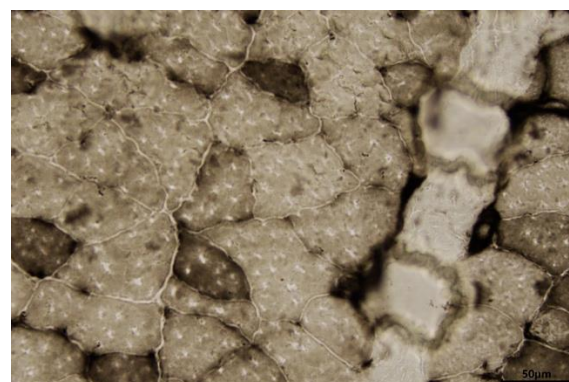

OC6

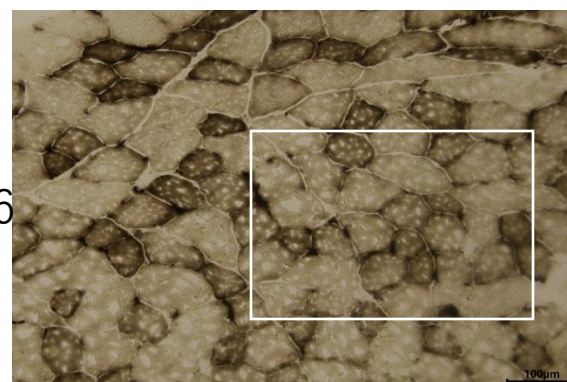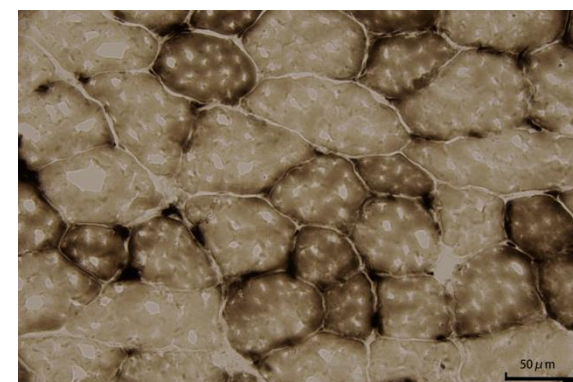



ATPASE 200X

400X

200X

400X

OA1

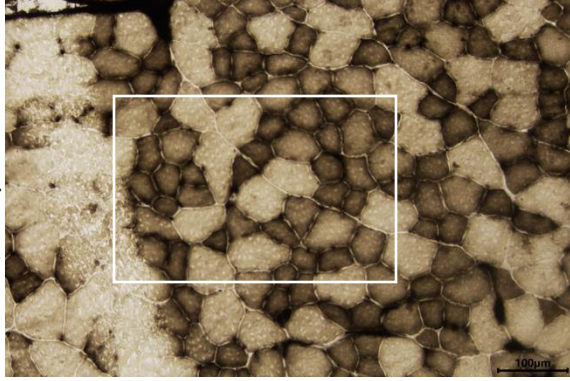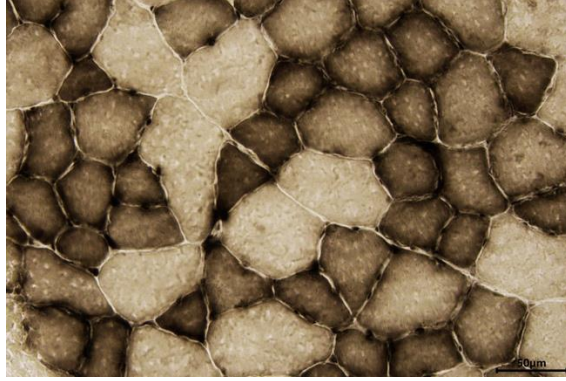

OA4

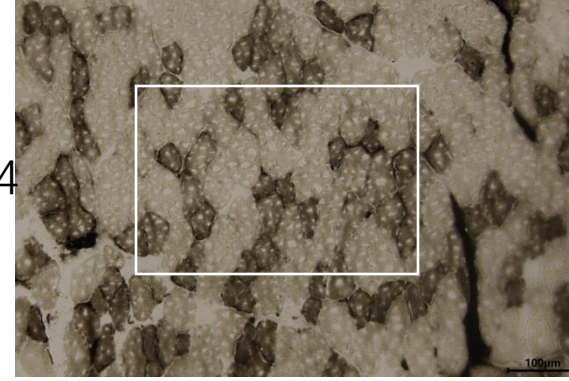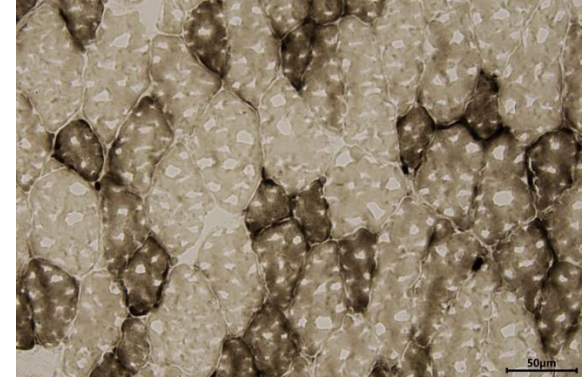

OA2

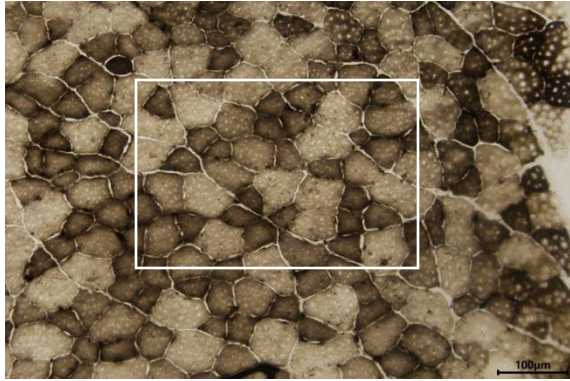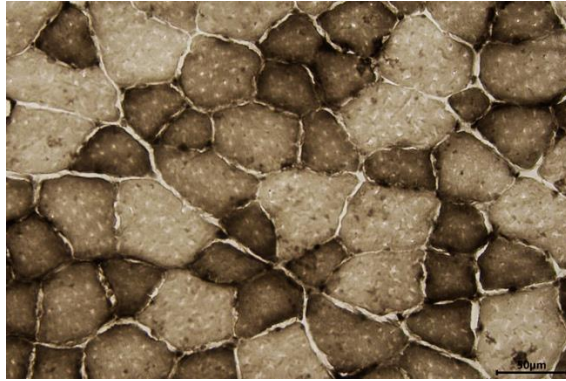

OA5

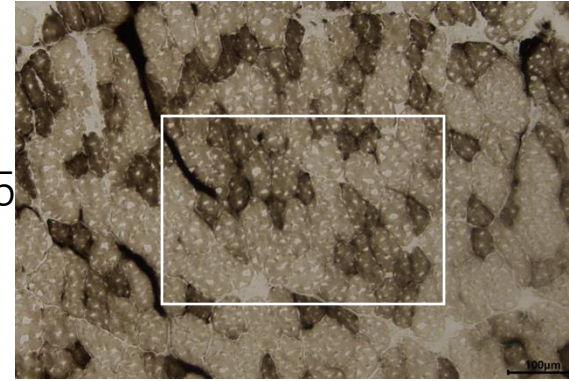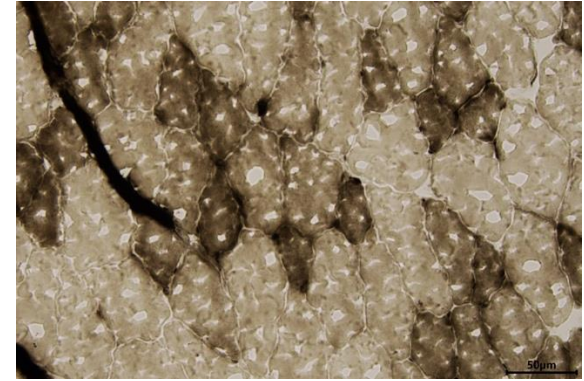

OA3

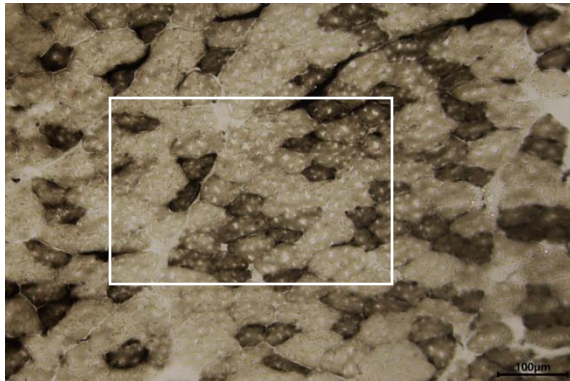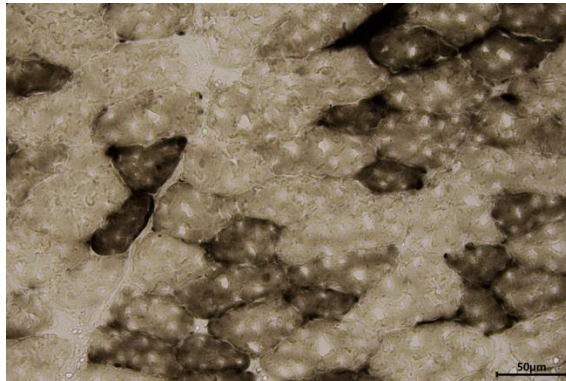

OA6

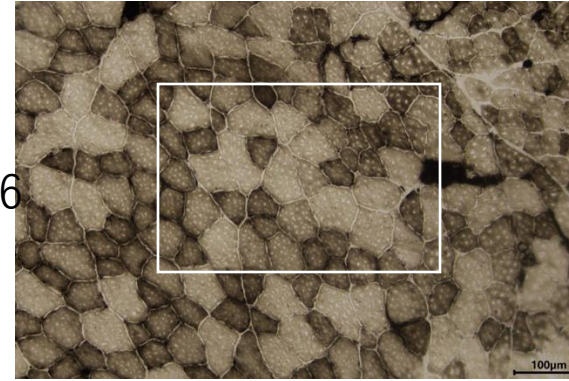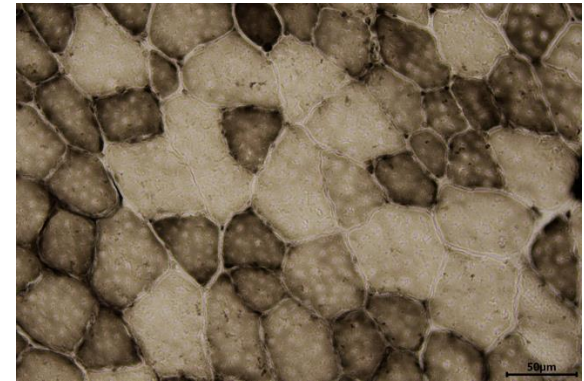

Supplement: Supplementary file 2 [file HE&ATPASE.pdf › HE&ATPASE.pdf]
