# Supplementary material for: Aerobic Exercise Improve Physical Endurance and Muscle Function by Ameliorating Oxidative Stress and Modulating Mitochondrial Dynamics in Aged Skeletal Muscle
Source: Research Square preprint supplement (doi:10.21203/rs.3.rs-6539156/v1), 2025-05-16
Supplement: Supplementary file 1 [file Aerobic Exercise Program 1.pdf › Aerobic Exercise Program 1.pdf]

### Aerobic Exercise Program

|        | Monday            | Tuesday           | Wednesday         | Thursday          | Friday            |
|--------|-------------------|-------------------|-------------------|-------------------|-------------------|
| 1 week | 8m/min;<br>60min  | 8m/min;<br>60min  | 8m/min;<br>60min  | 8m/min;<br>60min  | 8m/min;<br>60min  |
| 2 week | 10m/min;<br>60min | 10m/min;<br>60min | 10m/min;<br>60min | 10m/min;<br>60min | 10m/min;<br>60min |
| 3 week | 10m/min;<br>60min | 10m/min;<br>60min | 10m/min;<br>60min | 10m/min;<br>60min | 10m/min;<br>60min |
| 4 week | 12m/min;<br>60min | 12m/min;<br>60min | 12m/min;<br>60min | 12m/min;<br>60min | 12m/min;<br>60min |
| 5 week | 12m/min;<br>60min | 12m/min;<br>60min | 12m/min;<br>60min | 12m/min;<br>60min | 12m/min;<br>60min |
| 6 week | 13m/min;<br>60min | 13m/min;<br>60min | 13m/min;<br>60min | 13m/min;<br>60min | 13m/min;<br>60min |
| 7 week | 13m/min;<br>60min | 13m/min;<br>60min | 13m/min;<br>60min | 13m/min;<br>60min | 13m/min;<br>60min |
| 8 week | 14m/min;<br>60min | 14m/min;<br>60min | 14m/min;<br>60min | 14m/min;<br>60min | 14m/min;<br>60min |

\* The table shows the maximum speed of weekly exercise and the duration of a single exercise session.
