# Supplementary material for: Aerobic Exercise Improve Physical Endurance and Muscle Function by Ameliorating Oxidative Stress and Modulating Mitochondrial Dynamics in Aged Skeletal Muscle
Source: Research Square preprint supplement (doi:10.21203/rs.3.rs-6539156/v1), 2025-05-16
Supplement: Supplementary file 3 [file WB.pdf › WB.pdf]

CAT(60 kDa)

YC YC YA YA OC OC OA OA

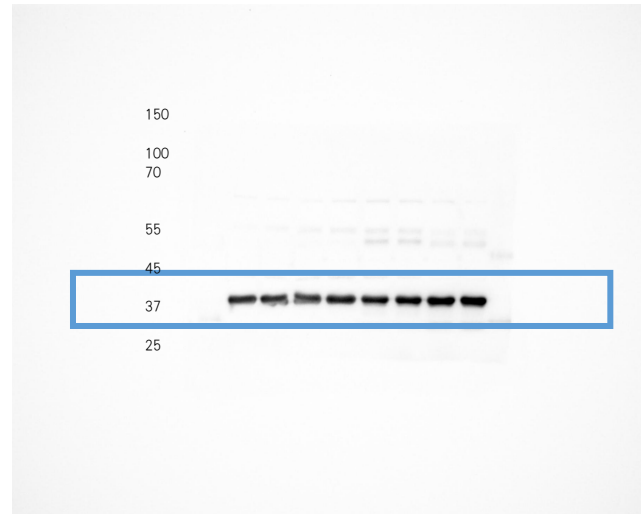

YC YC YA YA OC OC OA OA

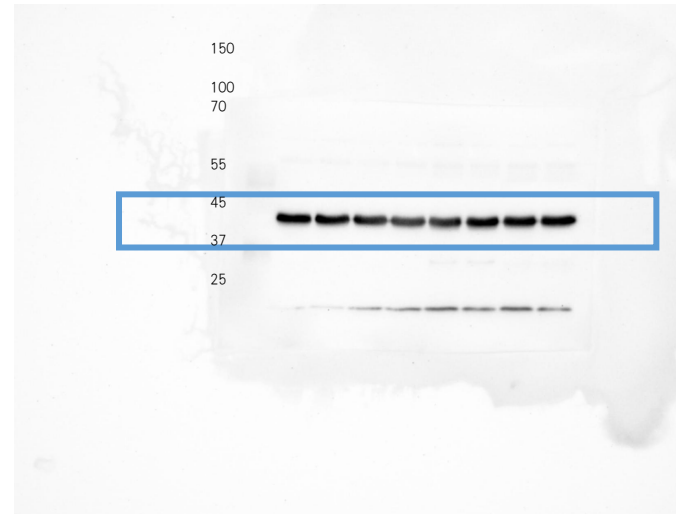

YC YC YA YA OC OC OA OA

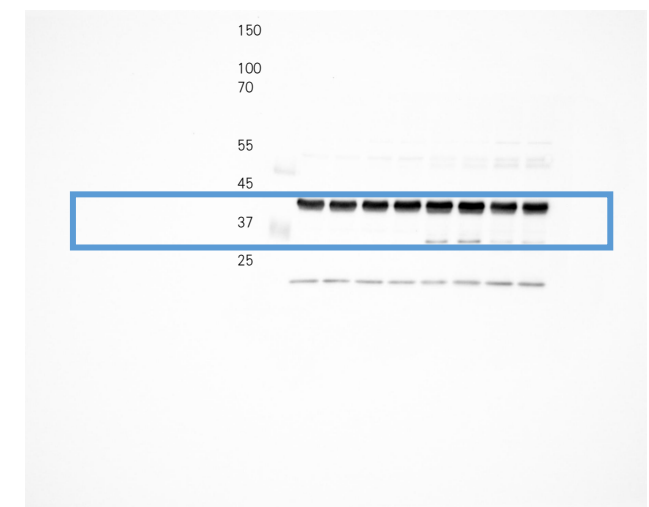

GAPDH

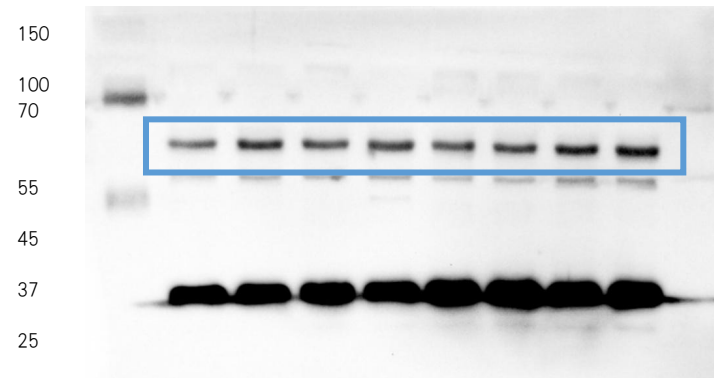

GAPDH

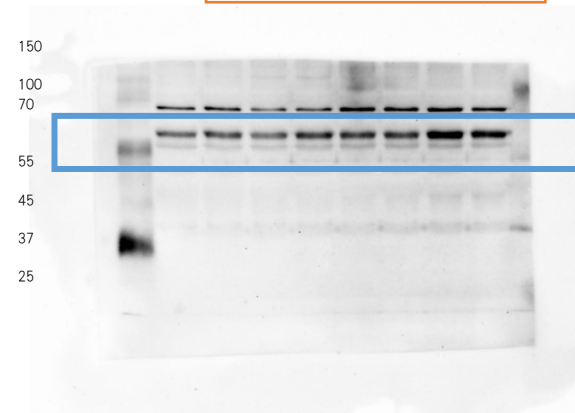

GAPDH

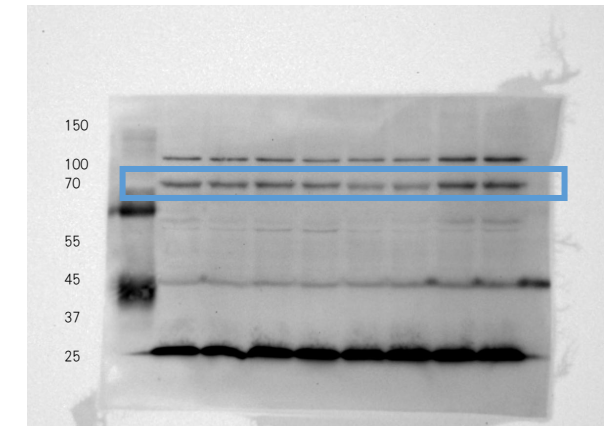

CAT

CAT

CAT

SOD1(15 kDa)

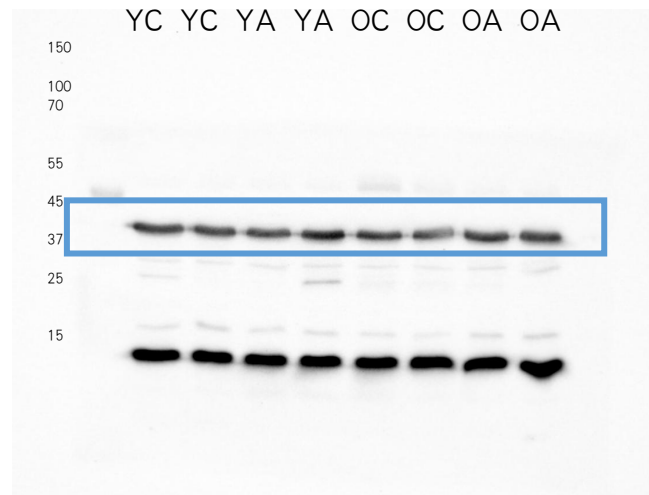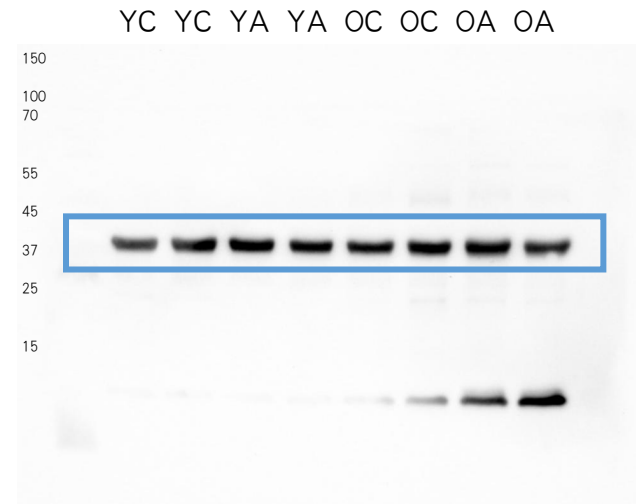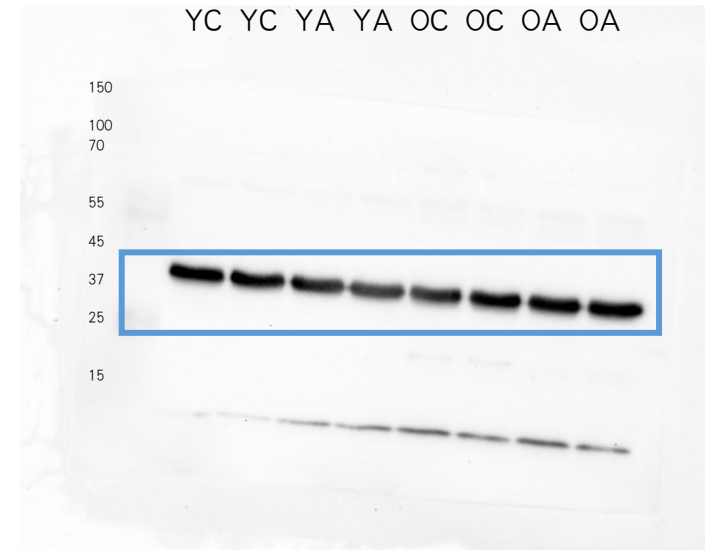

GAPDH

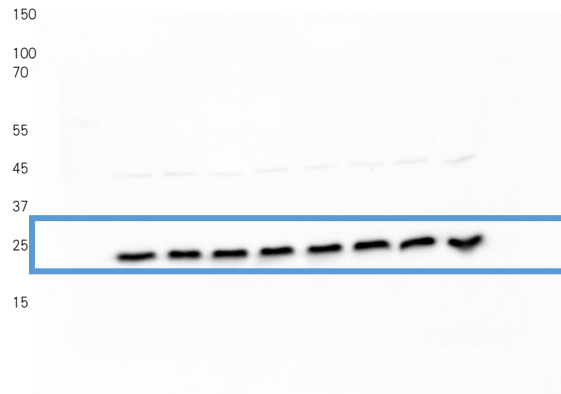

SOD1

GAPDH

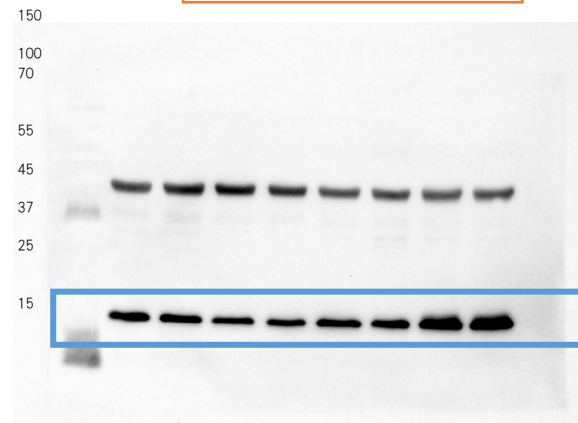

SOD1

GAPDH

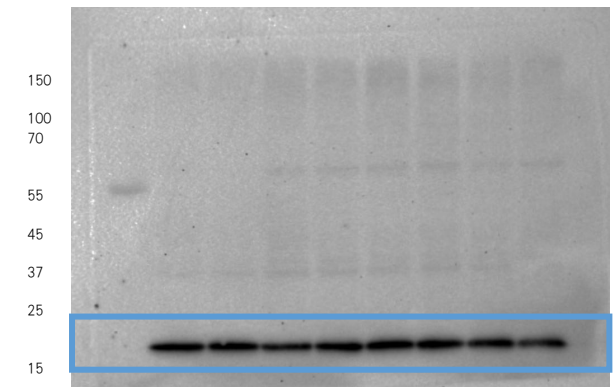

SOD1

## Sestrin1(68 kDa)

YC YC YA YA OC OC OA OA

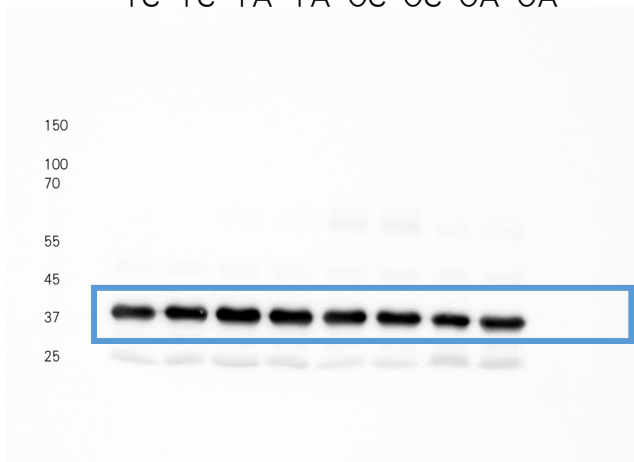

GAPDH

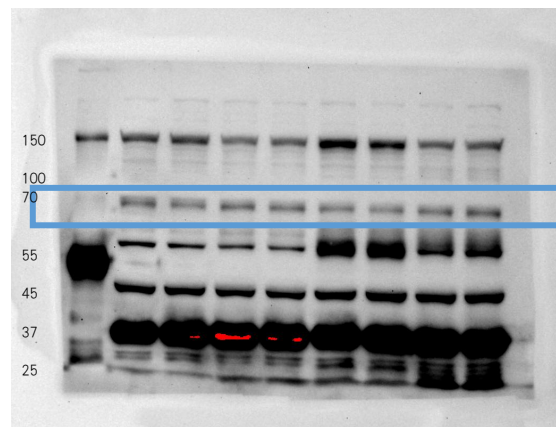

Sestrin1

YC YC YA YA OC OC OA OA

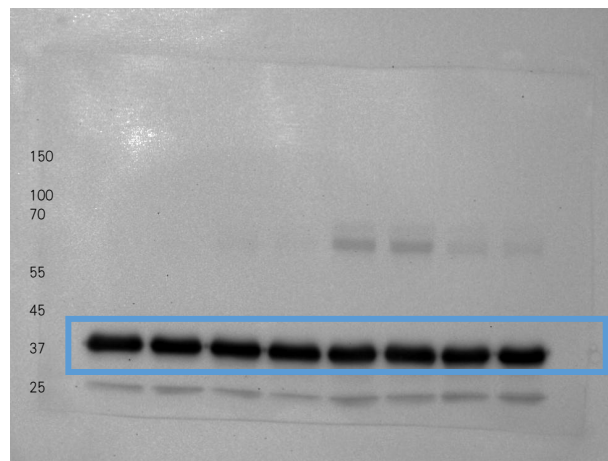

GAPDH

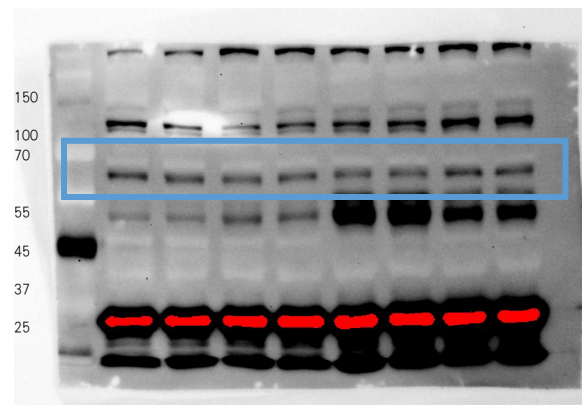

Sestrin1

YC YC YA YA OC OC OA OA

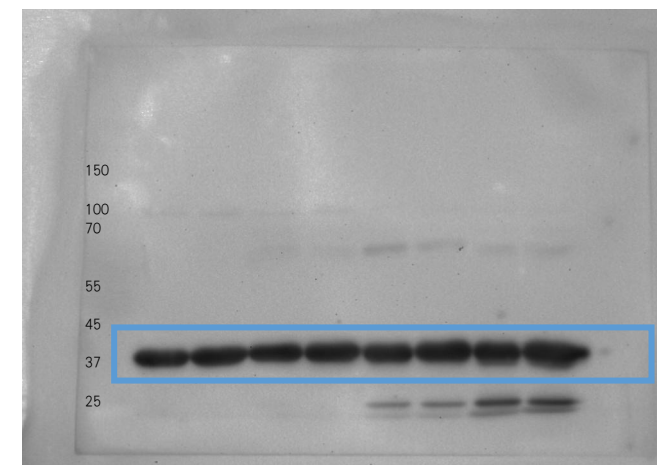

GAPDH

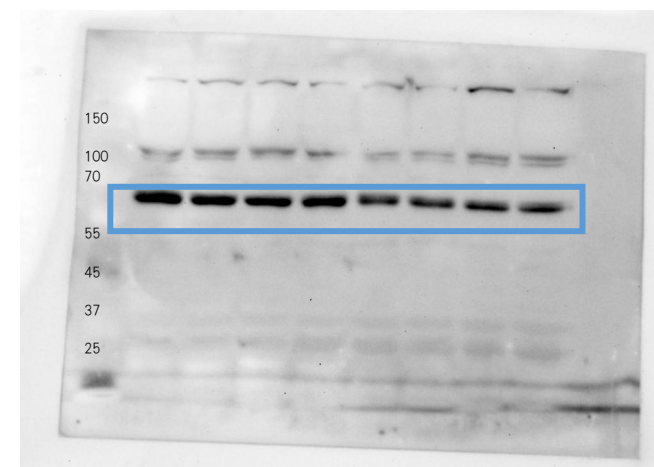

Sestrin1

AMPK(62 kDa)

YC YC YA YA OC OC OA OA

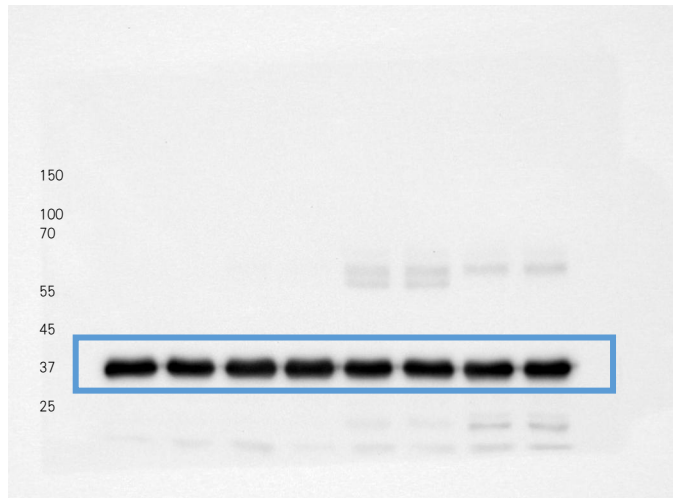

YC YC YA YA OC OC OA OA

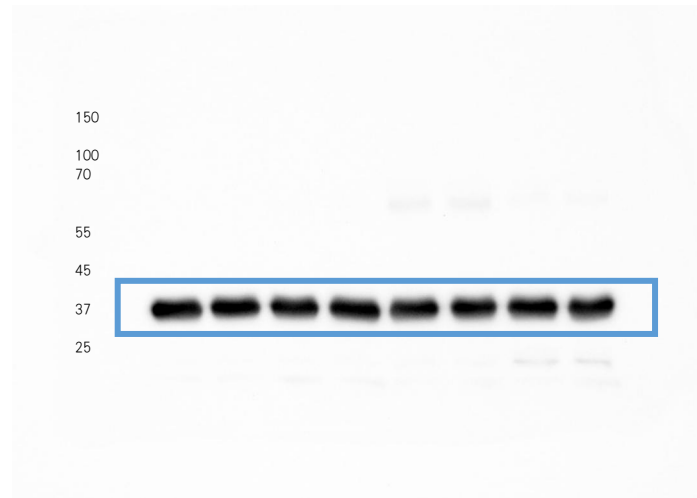

YC YC YA YA OC OC OA OA

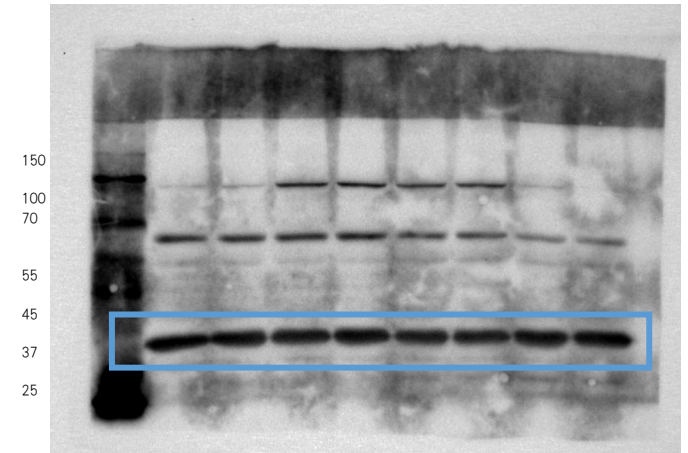

GAPDH

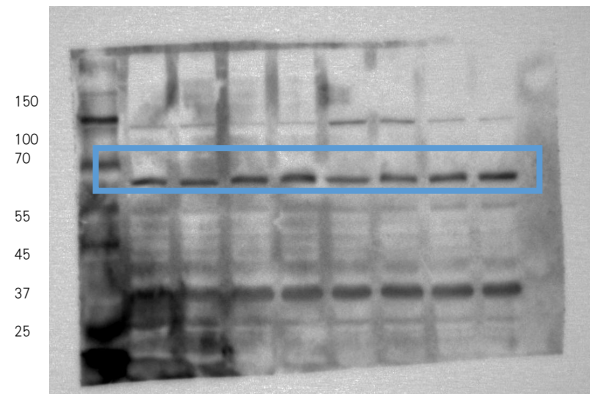

AMPK

GAPDH

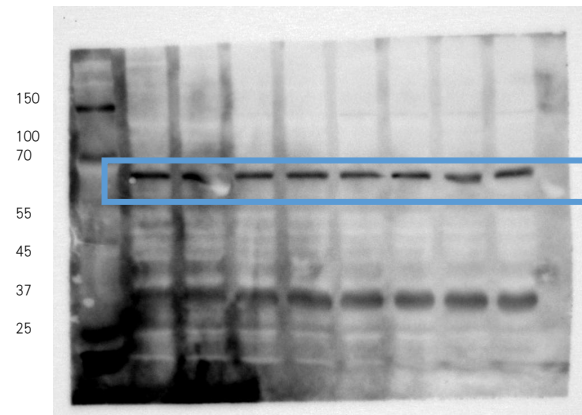

AMPK

GAPDH

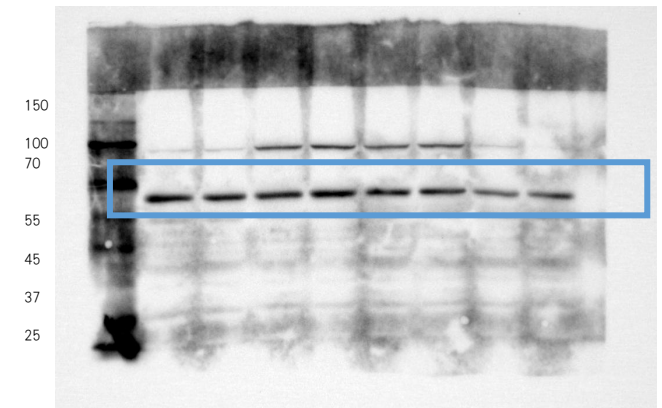

AMPK



p-AMPK(62 kDa)

YC YC YA YA OC OC OA OA

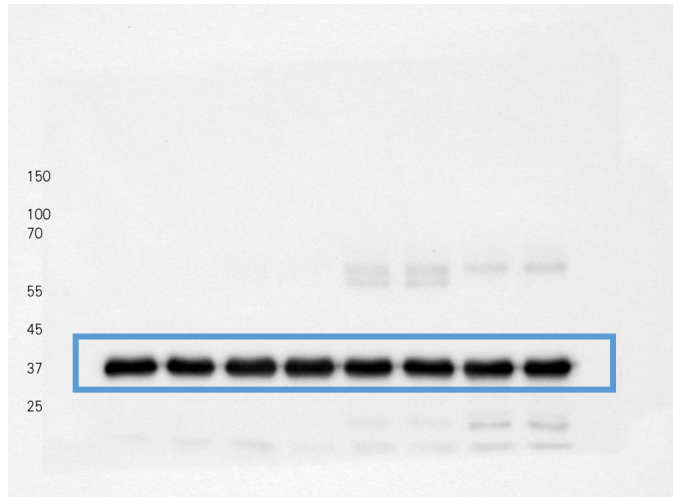

YC YC YA YA OC OC OA OA

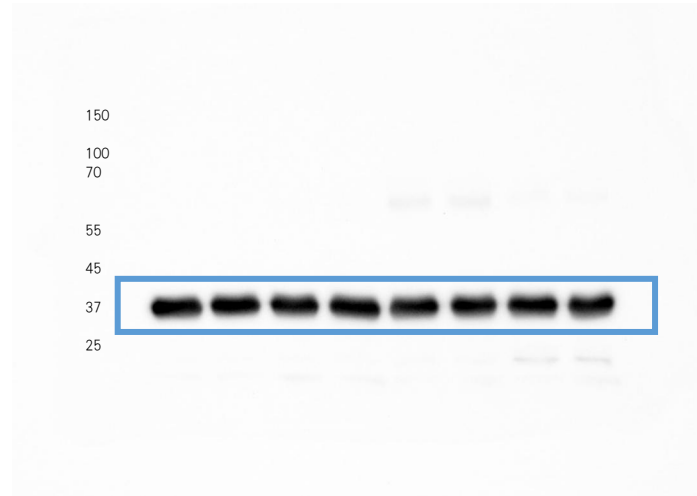

YC YC YA YA OC OC OA OA

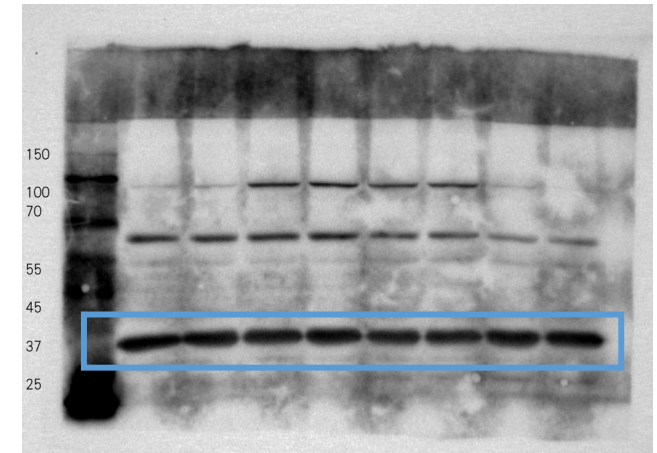

GAPDH

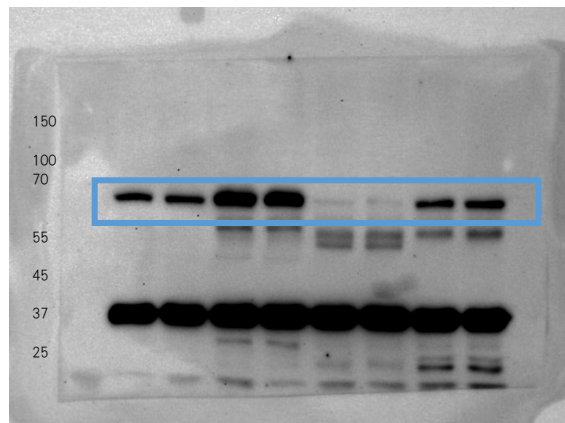

GAPDH

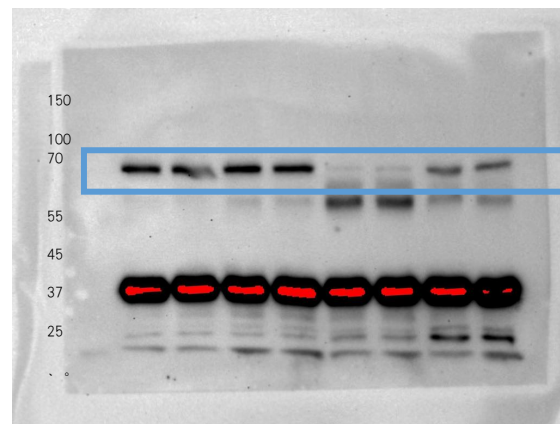

GAPDH

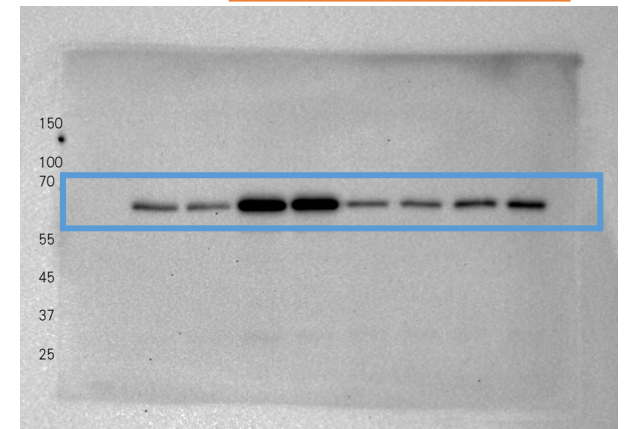

p-AMPK

p-AMPK

p-AMPK

PGC-1  $\alpha$  (93 kDa)

YC YC YA YA OC OC OA OA

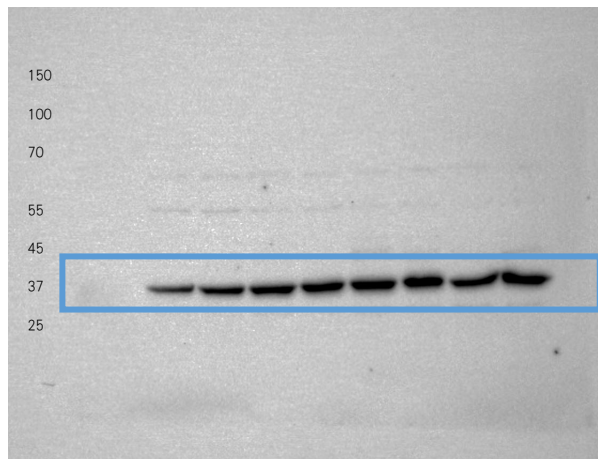

GAPDH

YC YC YA YA OC OC OA OA

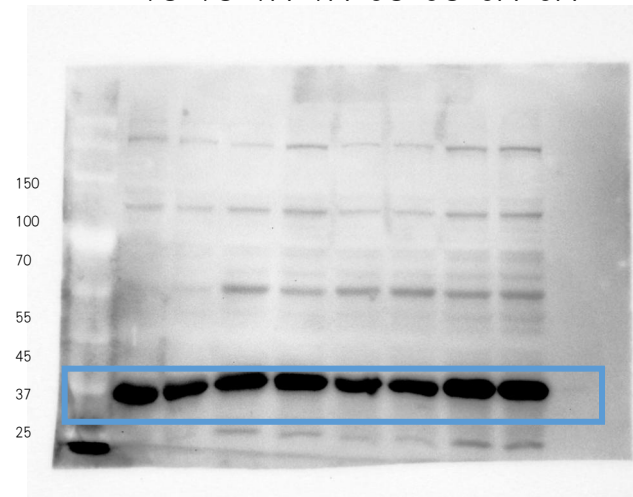

GAPDH

YC YC YA YA OC OC OA OA

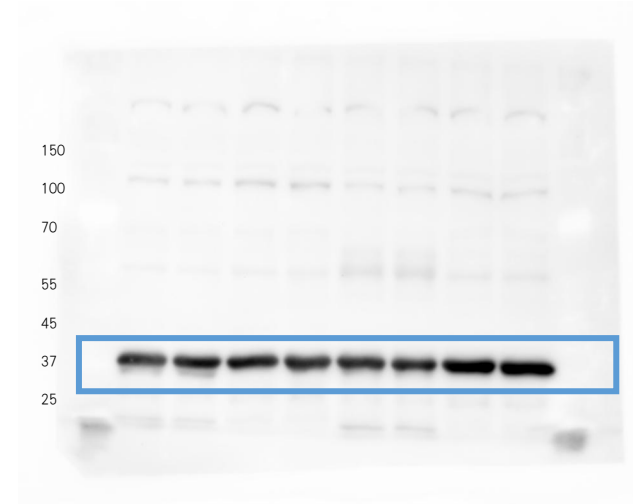

GAPDH

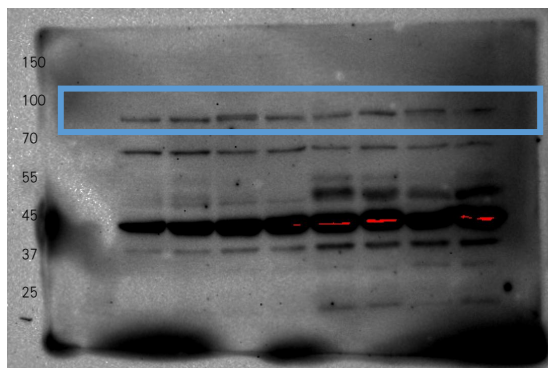

PGC-1  $\alpha$

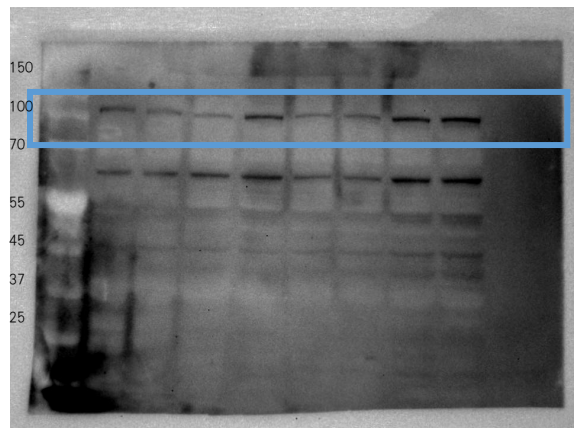

PGC-1  $\alpha$

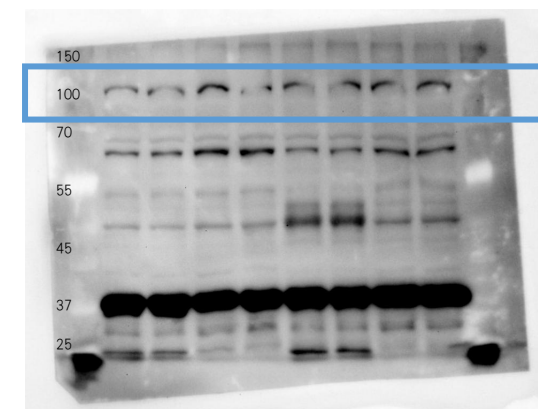

PGC-1  $\alpha$

COX-IV(17 kDa)

YC YC YA YA OC OC OA OA

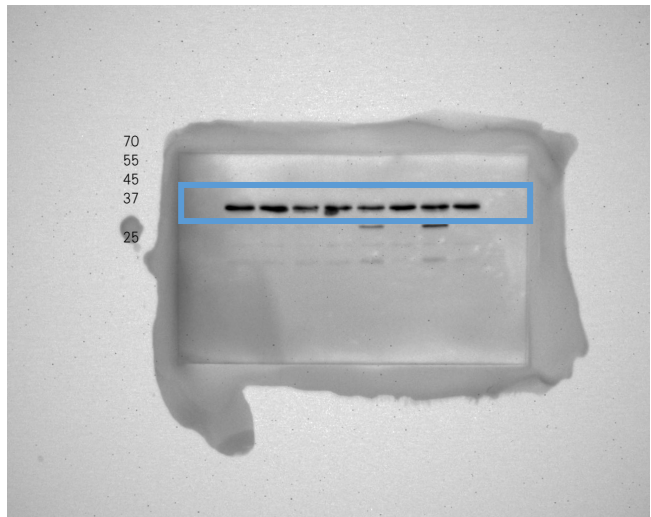

GAPDH

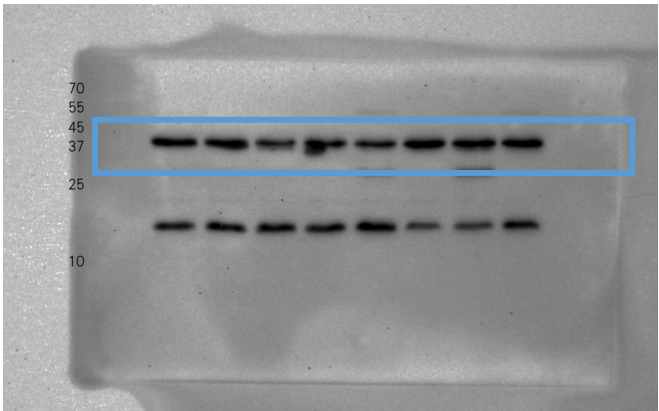

COX-IV

YC YC YA YA OC OC OA OA

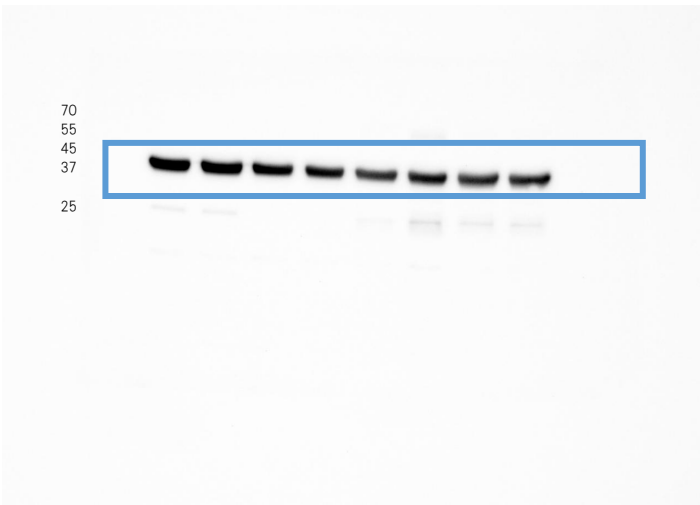

GAPDH

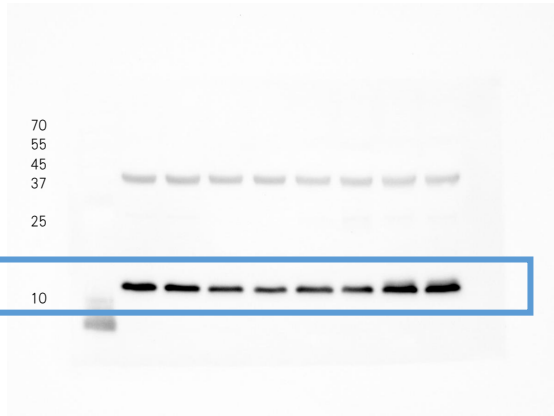

COX-IV

YC YC YA YA OC OC OA OA

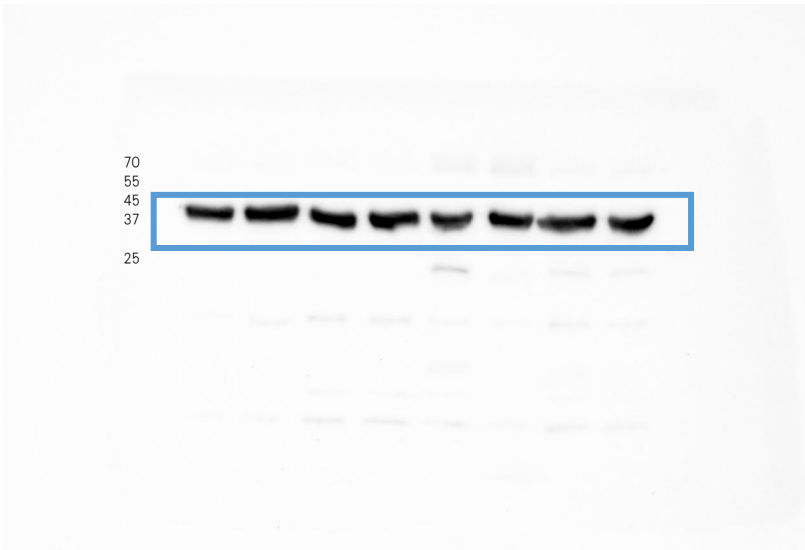

GAPDH

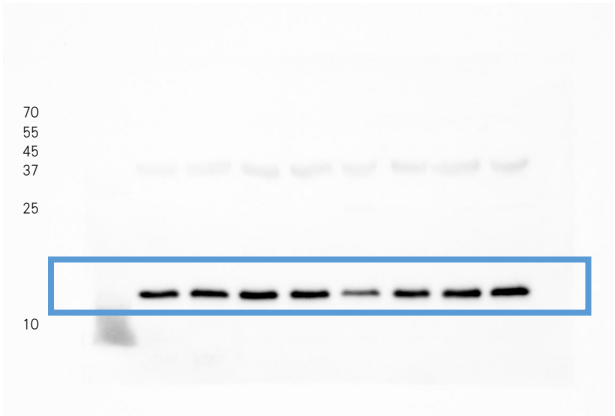

COX-IV



VDAC1/2(31 kDa)

YC YC YA YA OC OC OA OA

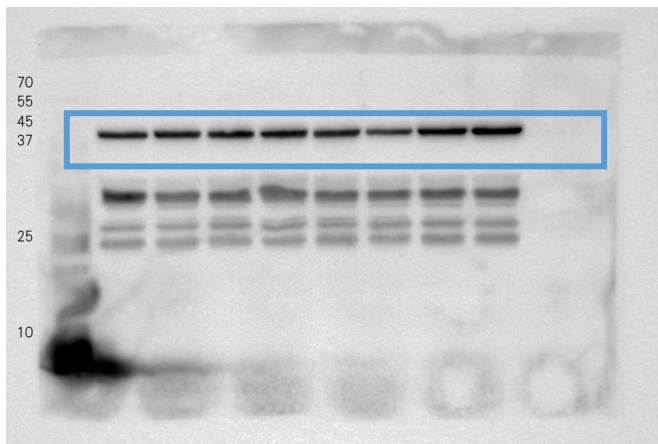

YC YC YA YA OC OC OA OA

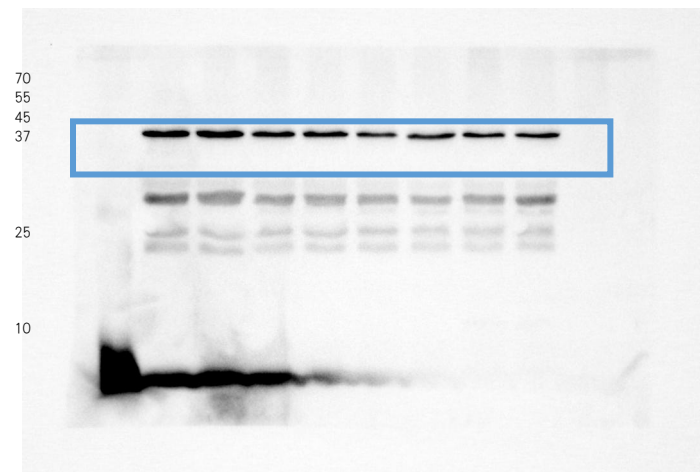

YC YC YA YA OC OC OA OA

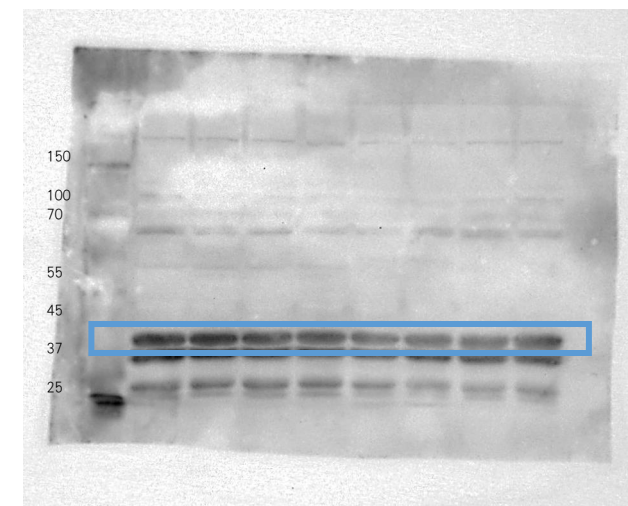

GAPDH

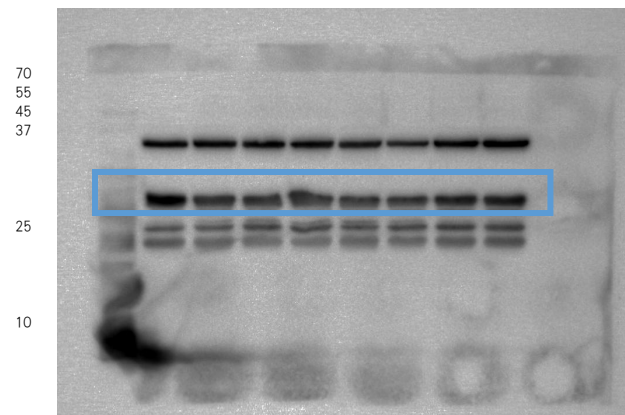

GAPDH

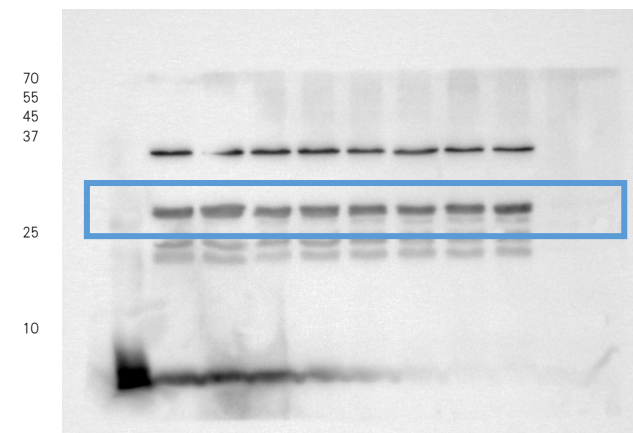

GAPDH

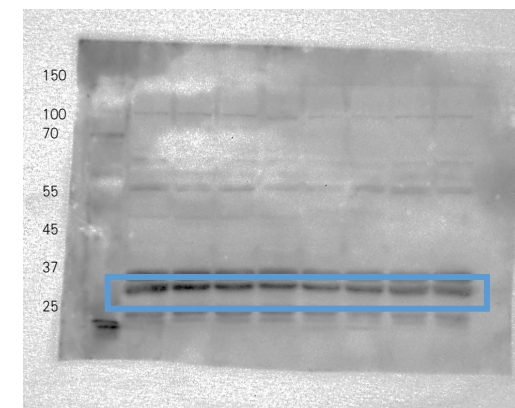

VDAC1/2

VDAC1/2

VDAC1/2



DRP1(78kDa)

YC YC YA YA OC OC OA OA

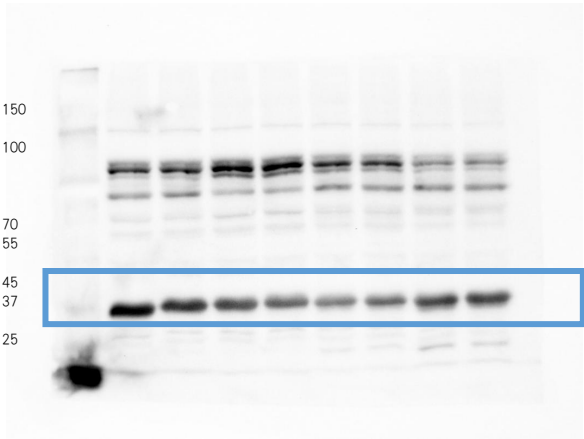

YC YC YA YA OC OC OA OA

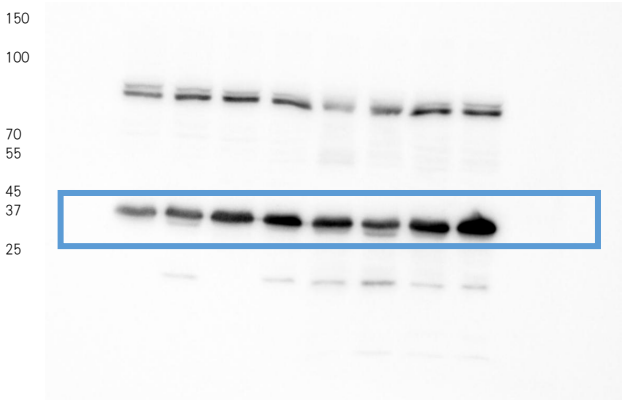

YC YC YA YA OC OC OA OA

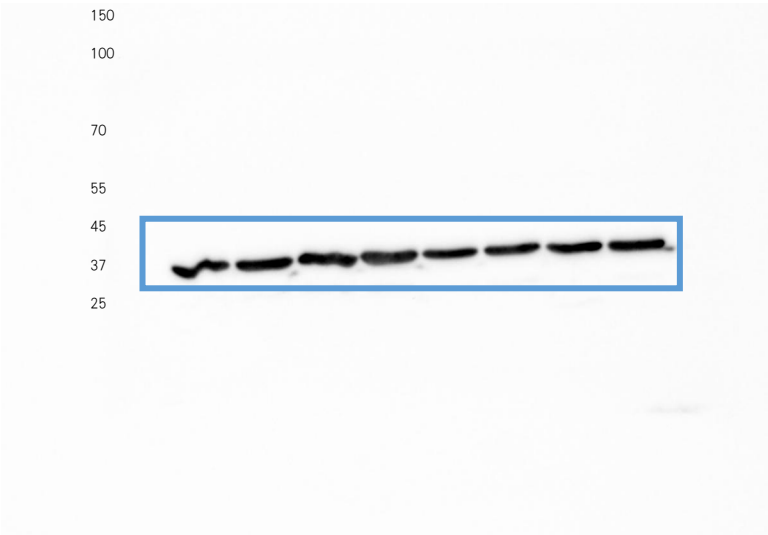

GAPDH

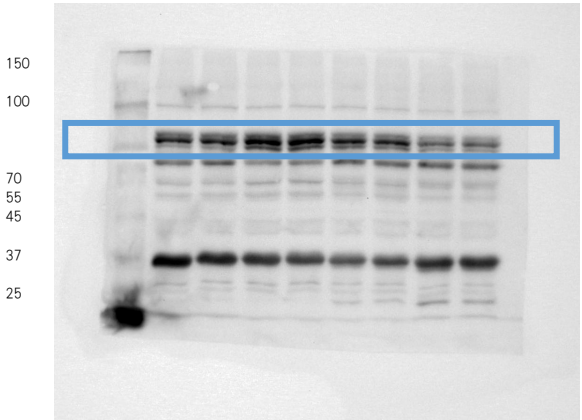

GAPDH

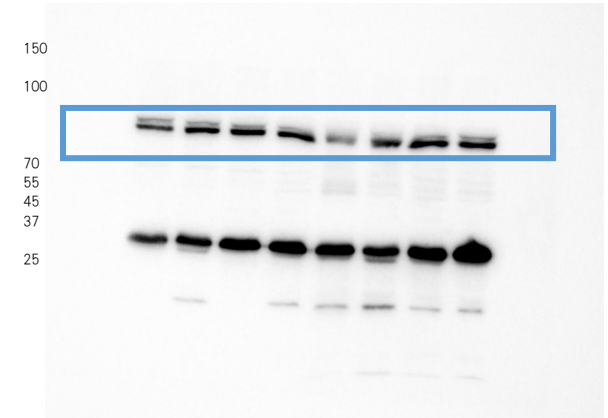

GAPDH

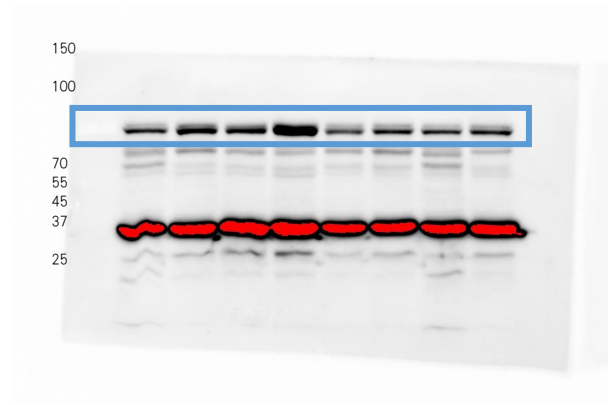

DRP1

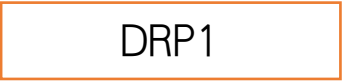

DRP1

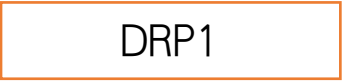

DRP1

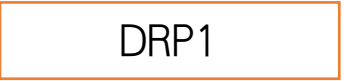

MFN2(86 kDa)

YC YC YA YA OC OC OA OA

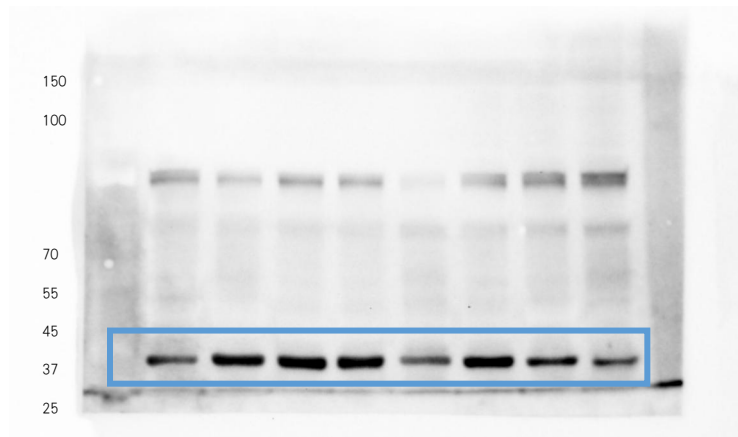

GAPDH

YC YC YA YA OC OC OA OA

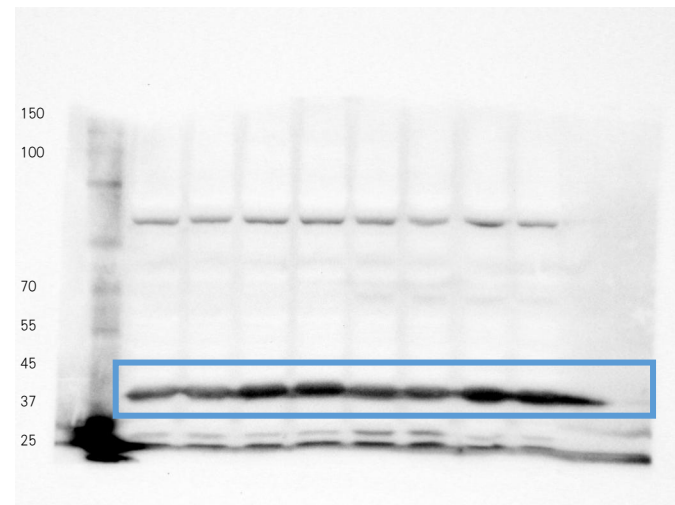

GAPDH

YC YC YA YA OC OC OA OA

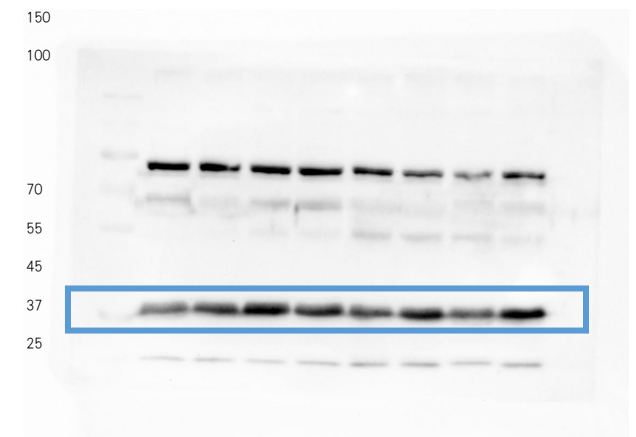

GAPDH

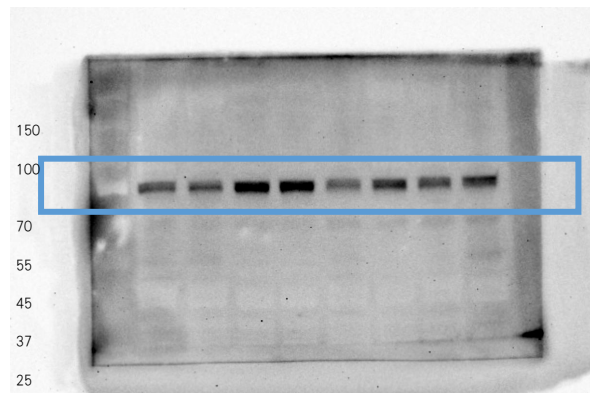

MFN2

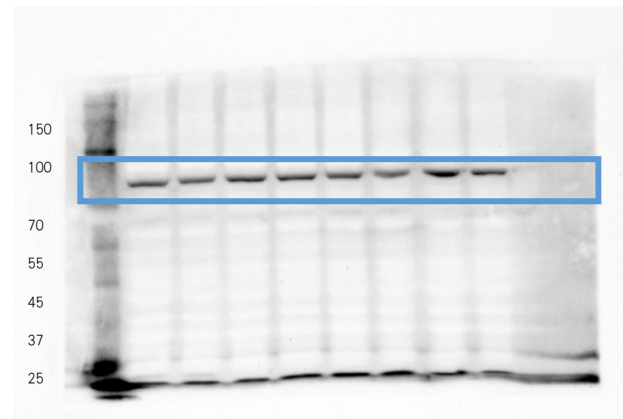

MFN2

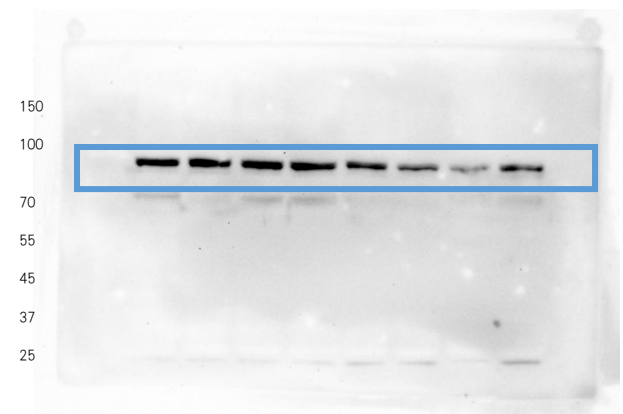

MFN2

OPA1(80–100 kDa)

YC YC YA YA OC OC OA OA

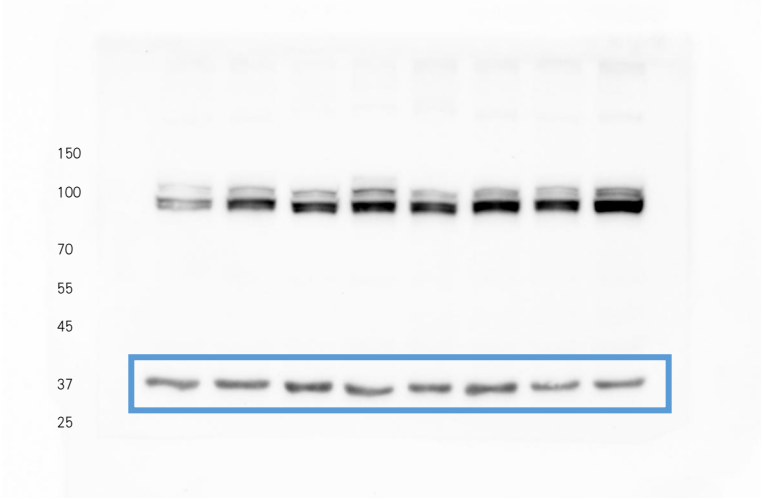

GAPDH

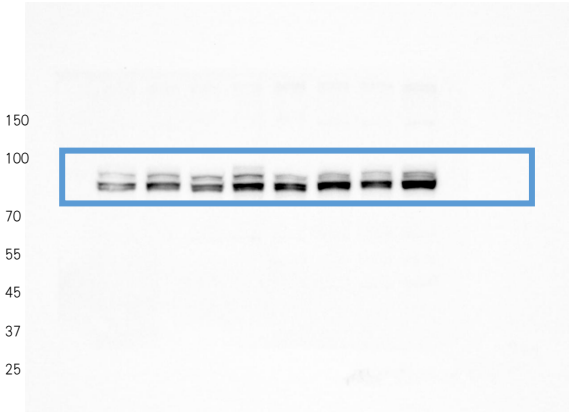

OPA1

YC YC YA YA OC OC OA OA

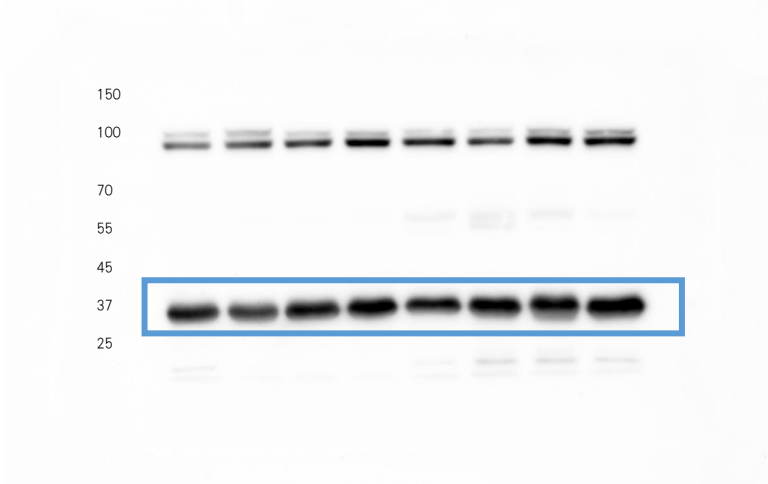

GAPDH

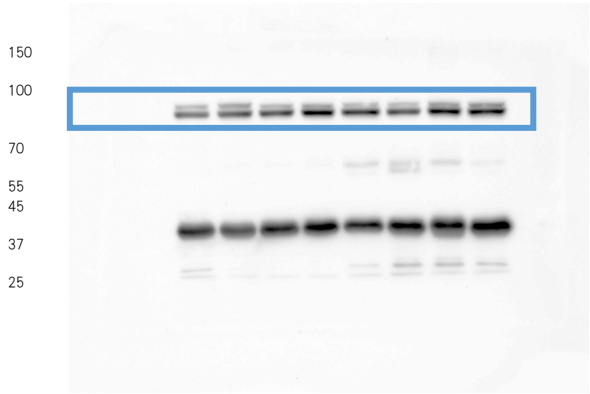

OPA1

YC YC YA YA OC OC OA OA

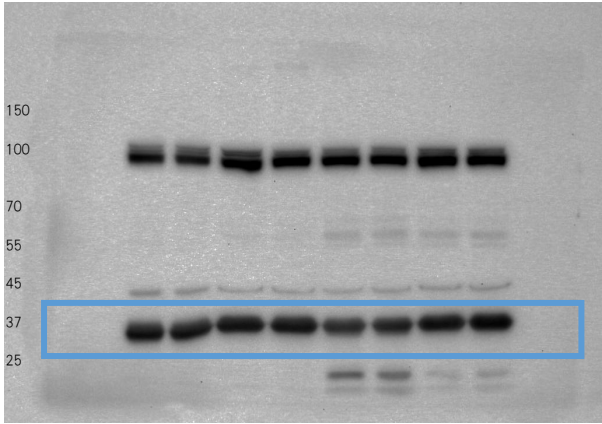

GAPDH

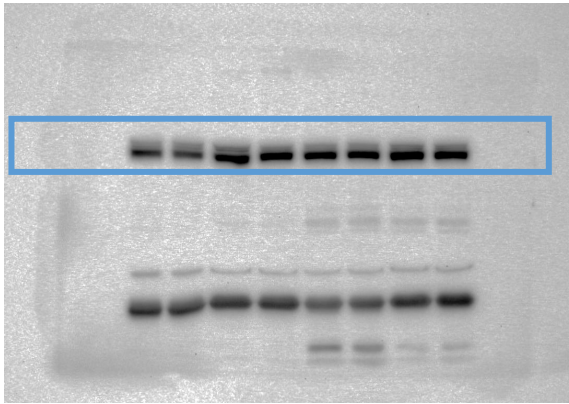

OPA1

PGAM5(32 kDa)

YC YC YA YA OC OC OA OA

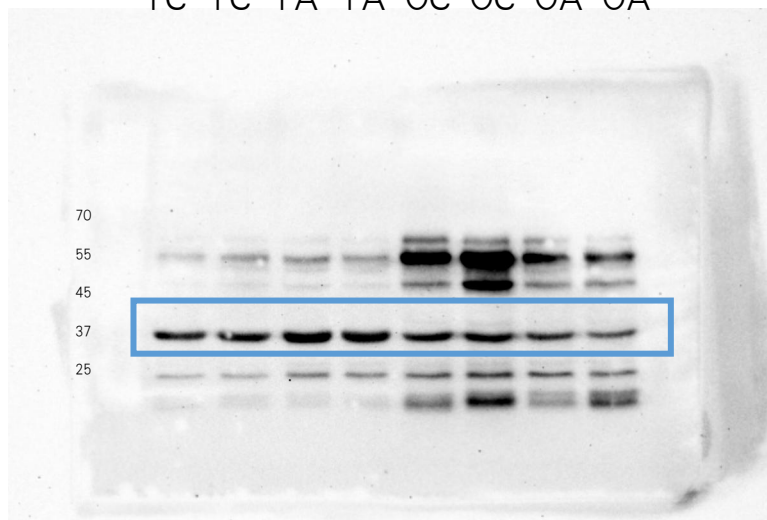

YC YC YA YA OC OC OA OA

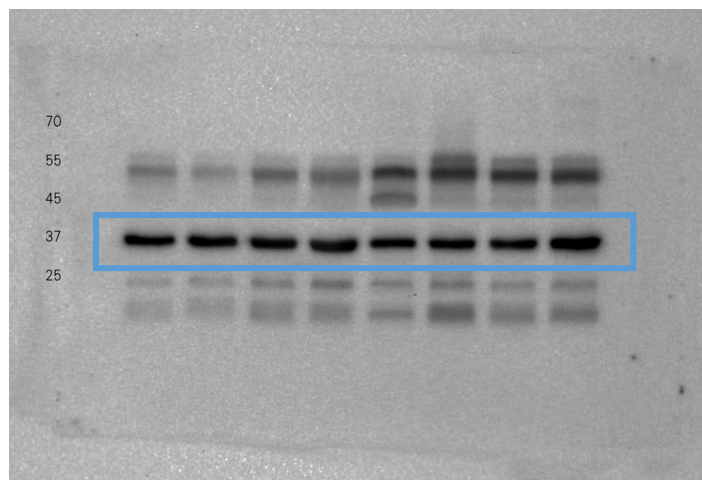

YC YC YA YA OC OC OA OA

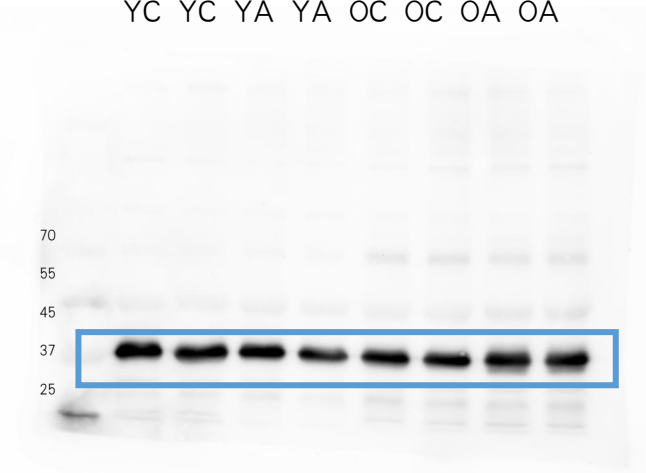

GAPDH

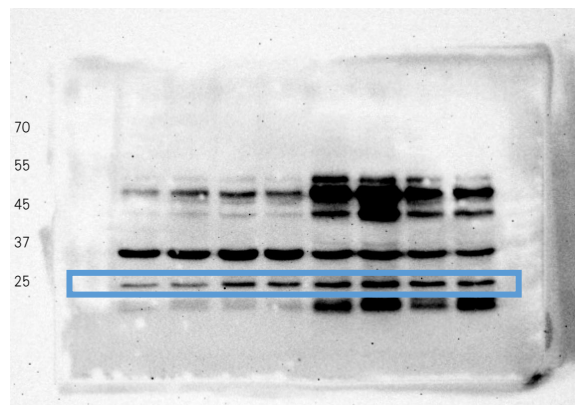

GAPDH

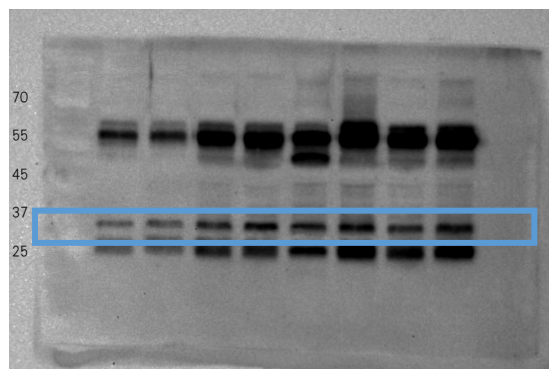

GAPDH

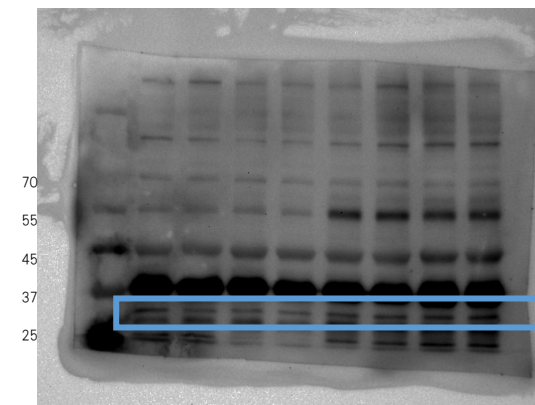

PGAM5

PGAM5

PGAM5



PINK1(45 kDa)

YC YC YA YA OC OC OA OA

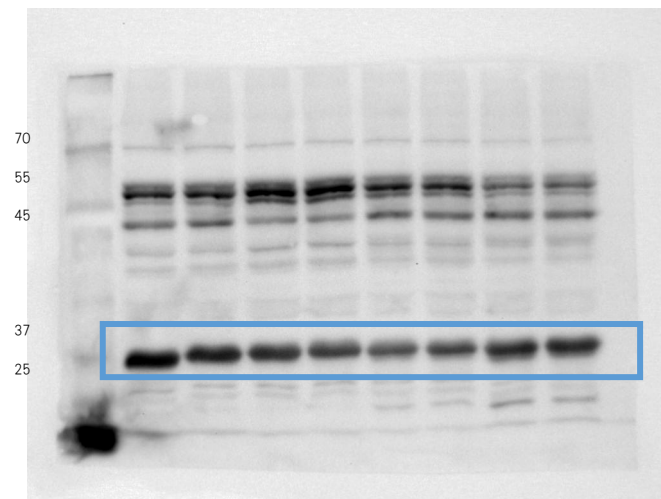

YC YC YA YA OC OC OA OA

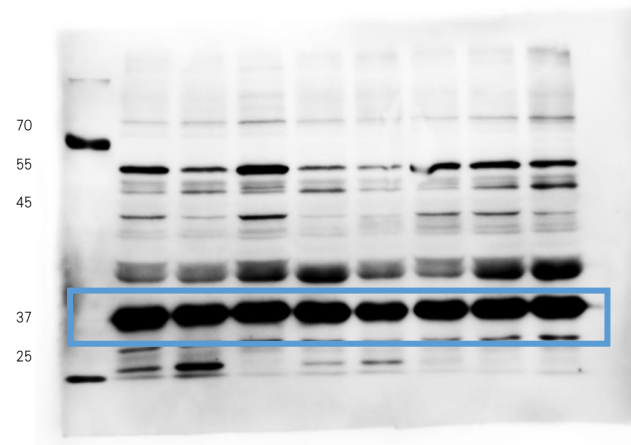

YC YC YA YA OC OC OA OA

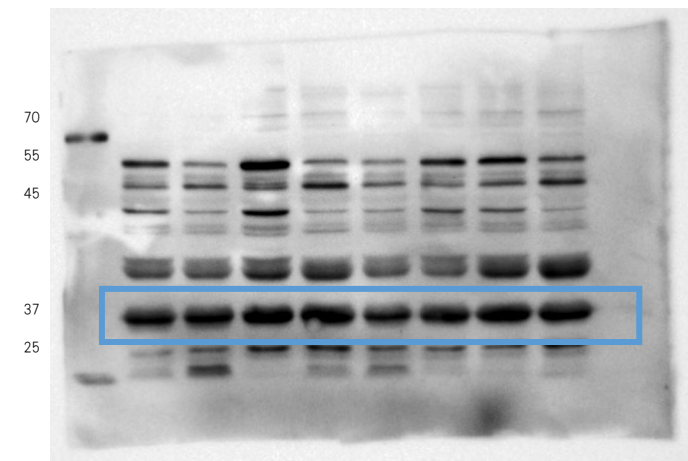

GAPDH

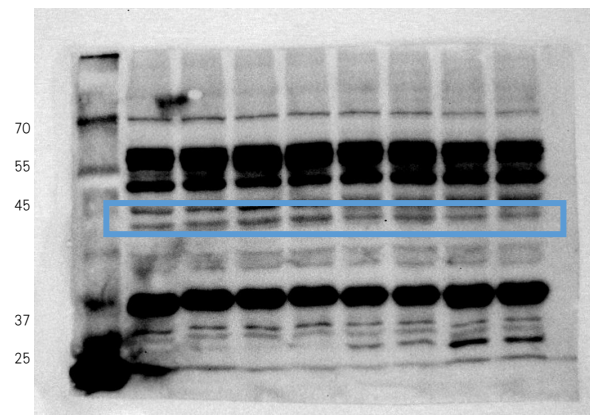

PINK1

GAPDH

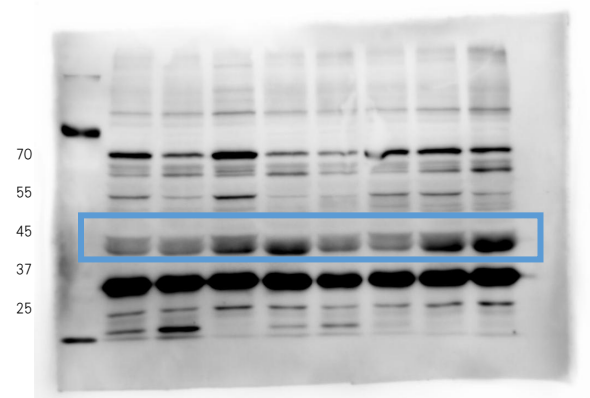

PINK1

GAPDH

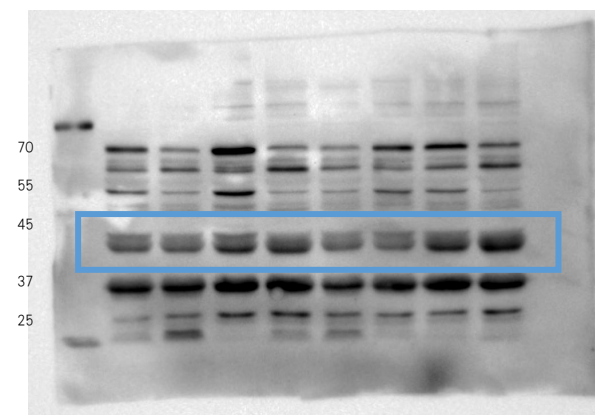

PINK1
